# Supplementary material
Source: PubMed Central journal article supplement (PMC4079355)
Supplement: supp_tpc.114.124677_tpc124677_SupplementalData.pdf [file supp_tpc.114.124677_tpc124677_SupplementalData.pdf]

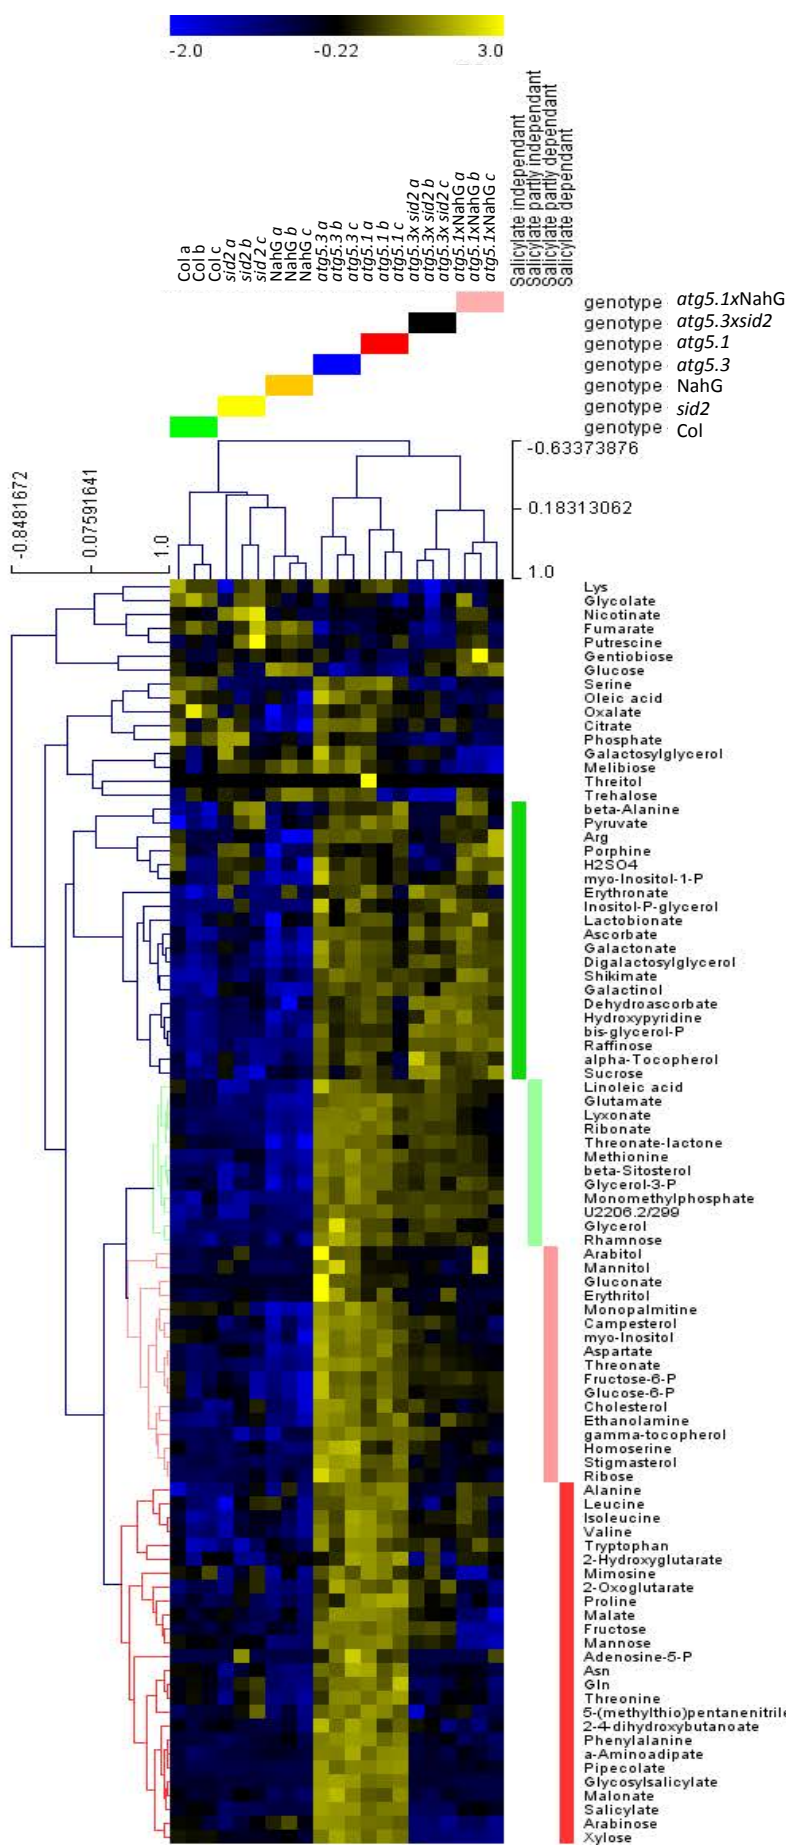

### Supplemental Figure 1: Hierarchic clustering of metabolite changes between *atg5* mutants and controls show salicylic dependence of metabolite classes.

Metabolite relative contents in the rosettes of *atg5*, *atg5.sid2*, *atg5.NahG*, *Col*, *NahG* and *sid2* genotypes, grown under low nitrate conditions for 60 days after sowing are analysed using hierarchic clustering tool (MEV4.0). Clusters show gradation for salicylic acid genotype dependencies. Metabolites that accumulate in *atg5* mutants whatever *Col* wild type, *NahG* and *sid2* genetic background are salicylic acid independent (deep green cluster). Metabolites that accumulate in *atg5* mutants but not in *atg5.sid2*, *atg5.NahG*, are salicylic acid dependent (deep red cluster). The two other clusters (light green and light red) are in between.

**A**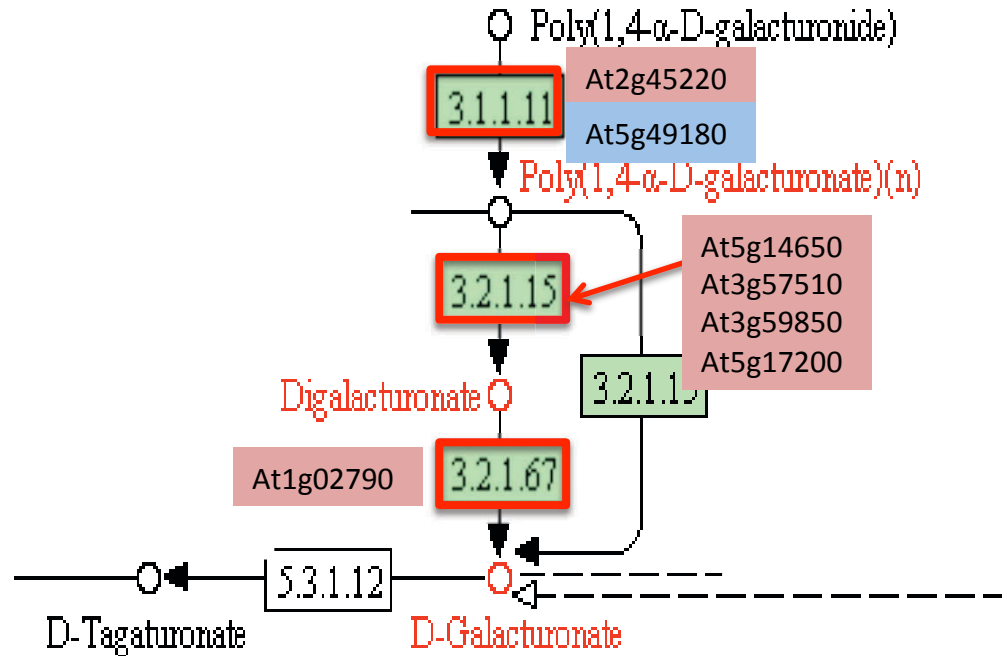**B**

| AGI       | Name and Function                             | <i>atg5</i> lowN 30DAS | <i>atg5</i> lowN 60DAS | <i>atg5</i> highN 60DAS |
|-----------|-----------------------------------------------|------------------------|------------------------|-------------------------|
| AT2G45220 | pectinesterase                                | 3.55                   | 8.14                   | 6.14                    |
| AT5G14650 | polygalacturonase, putative                   | 1.59                   | 2.45                   | 1.27                    |
| AT3G57510 | ADPG1; polygalacturonase                      | 0.86                   | 8.73                   | 5.49                    |
| AT3G59850 | polygalacturonase, putative                   | -2.23                  | 3.06                   | -0.52                   |
| AT5G17200 | polygalacturonase                             | -0.48                  | 0.10                   | 1.25                    |
| AT1G02790 | PGA4 (POLYGALACTURONASE 4); polygalacturonase | 0.51                   | 2.64                   | 0.40                    |
| AT5G49180 | pectinesterase family protein                 | -1.07                  | -1.30                  | -0.47                   |

**Supplemental Figure 2: Genes involved in galacturonate biosynthesis are up-regulated in *atg5*.** (A) D-galacturonate pathway was adapted from the KEGG galacturonate pathway available online (<http://www.genome.jp/kegg/pathway.html>). Most of the genes identified on KEGG as coding for the pectine esterases (EC.3.1.1.11) and polygalacturonases (EC.3.2.1.67 and EC.3.2.1.15) involved in the galacturonate pathway are up-regulated (pink boxes) in *atg5* relative to wild type as shown in (B). Relative gene expression in *atg5* compared to wild type is presented as Log<sub>2</sub>(fold change) Significant up- or down-regulations (FDR%<10<sup>-5</sup>) are indicated by yellow or blue colored cells respectively.

**Supplemental Figure 3: Phytosterol pathway is up-regulated in *atg5*.** (A) Phytosterol pathway was adapted from the KEGG (<http://www.genome.jp/kegg/pathway.html>). Genes coding for SMT2, STE1 and CYP710A enzymes (pink boxes) are up-regulated in *atg5* relative to wild type (B): the relative expressions of SMT2, STE1 and CYP710A genes in *atg5* are presented as Log2(fold change). Significant up- or down-regulations (FDR%<10<sup>-5</sup>) are indicated by yellow or blue colored cells respectively.

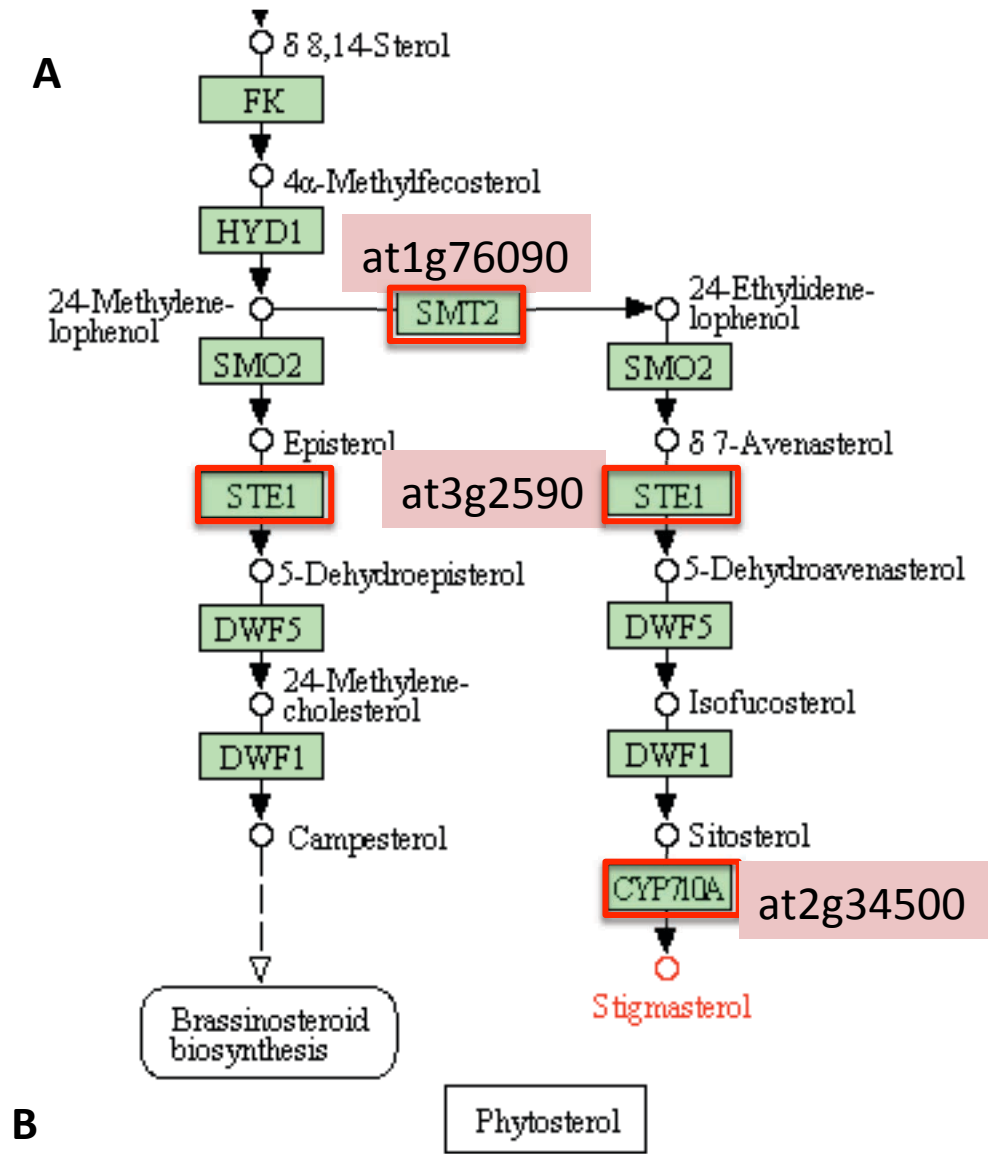

|           |                                        | <i>atg5</i> lowN 30DAS | <i>atg5</i> lowN 60DAS | <i>atg5</i> highN 60DAS |
|-----------|----------------------------------------|------------------------|------------------------|-------------------------|
| AT1G76090 | SMT3 (STEROL METHYLTRANSFERASE 3)      | -0.441                 | 1.187                  | 0.450                   |
| AT3G02590 | delta 7-sterol-C5-desaturase, putative | -1.151                 | 1.627                  | 0.608                   |
| AT2G34500 | CYP710A1 (cytochrome P450, family 710, | 0.998                  | 3.991                  | 2.936                   |

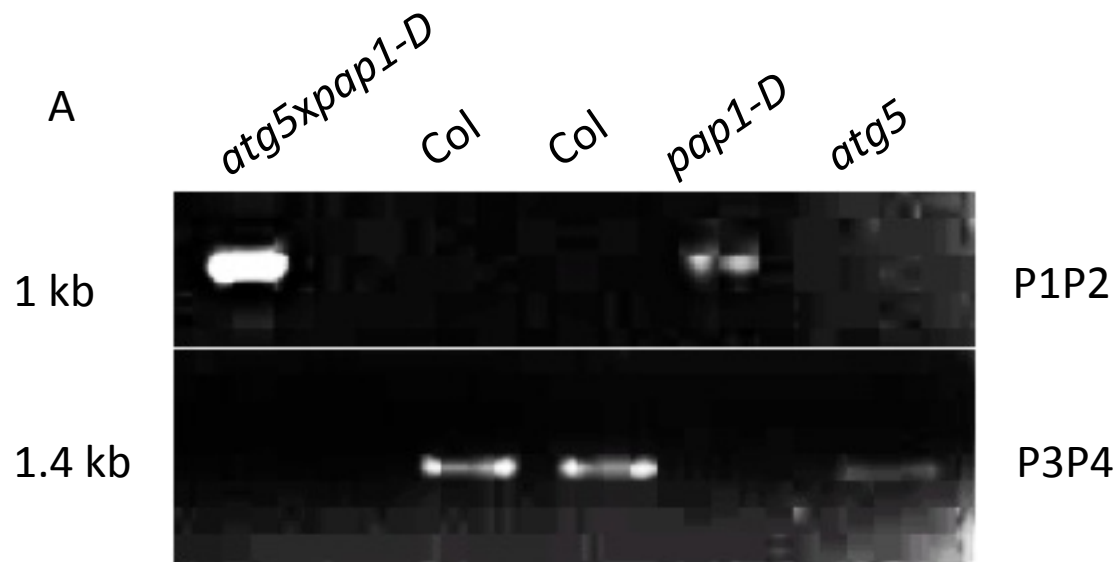

B P1: 5'-TGAGACTTTTCAACAAAGGG-3'  
P2: 5'-ACG GAA TAT CTG GAC AGC CGG A-3'  
P3: 5'-ACG GAA TAT CTG GAC AGC CGG A-3'  
P4: 5'-TGC AGA GAC TAC TCC CTC GTG C-3'

P3P4 amplification reveals *PAP1* wild type allele

P1P2 amplification reveals *pap1-D* dominant allele

**Supplemental Figure 4:** PCR genotyping of *atg5.pap1-D* double mutant. A: PCR products on gel. B: Primers used to amplify wild type *PAP1* (P3 and P4) and *pap1-D* (P1 and P2) alleles.

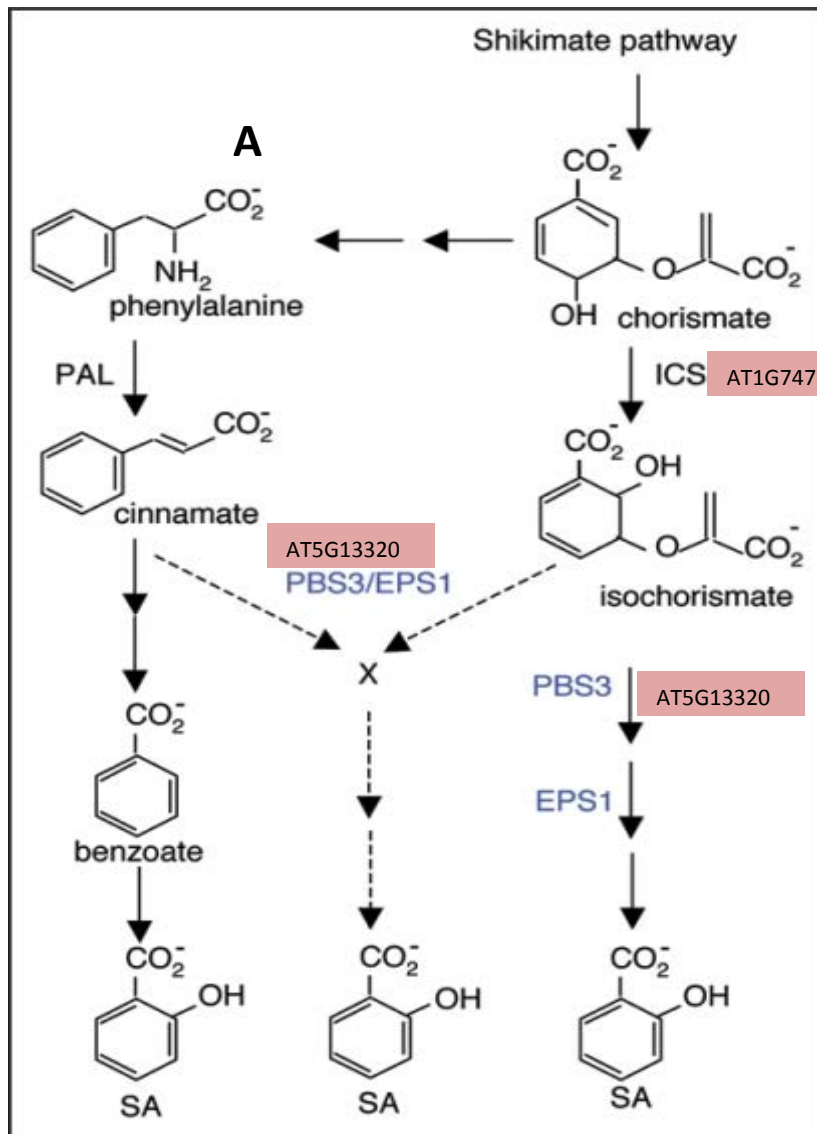

**Supplemental Figure 5:** Overexpression of isochorismate synthase (ICS) 1 and PBS3 genes in *atg5* relative to wild type explain SA accumulation in autophagy mutants. A: SA biosynthesis pathway showing steps catalysed by ICS and PBS3. B: Genes involved in SA biosynthesis are up-regulated in *atg5* relative to wild type; relative gene expressions in *atg5* compared to wild type are presented as Log<sub>2</sub>(fold change) Significant up-regulation (FDR%<10<sup>-5</sup>) is indicated by red cells. C: Relative SA concentrations in Col wild type, *atg* mutants and RNAi line grown under low nitrate supply for 60 and 75 days after sowing.

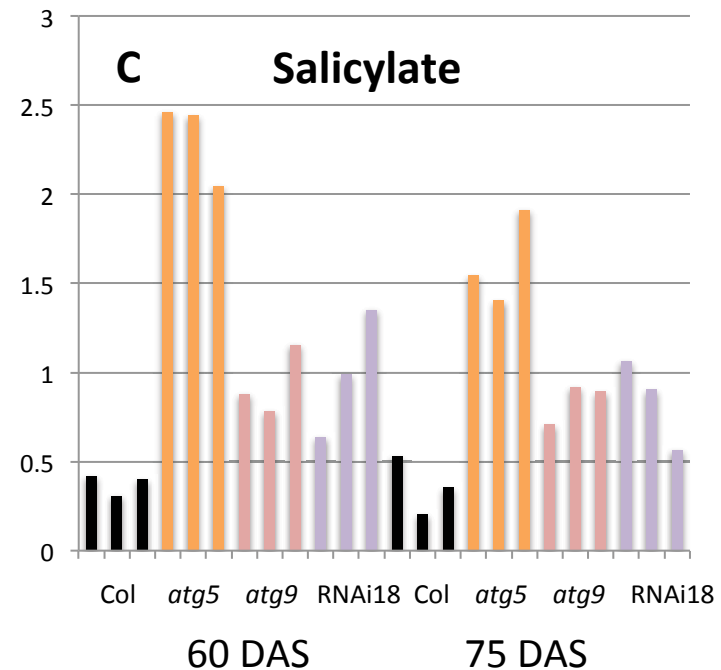**B**

| AGI       | function or name                                       | <i>atg5</i> & <i>atg9</i> 30DAS LowN | <i>atg5</i> & <i>atg9</i> 60DAS LowN | <i>atg5</i> 60DAS HighN |
|-----------|--------------------------------------------------------|--------------------------------------|--------------------------------------|-------------------------|
| at1g74710 | isochorismate synthase 1 (ICS1) / isochorismate mutase | -0.106                               | 2.197                                | 1.131                   |
| at5g13320 | PBS3 (AVRPPHB SUSCEPTIBLE 3)                           | 3.759                                | 4.058                                | 2.899                   |



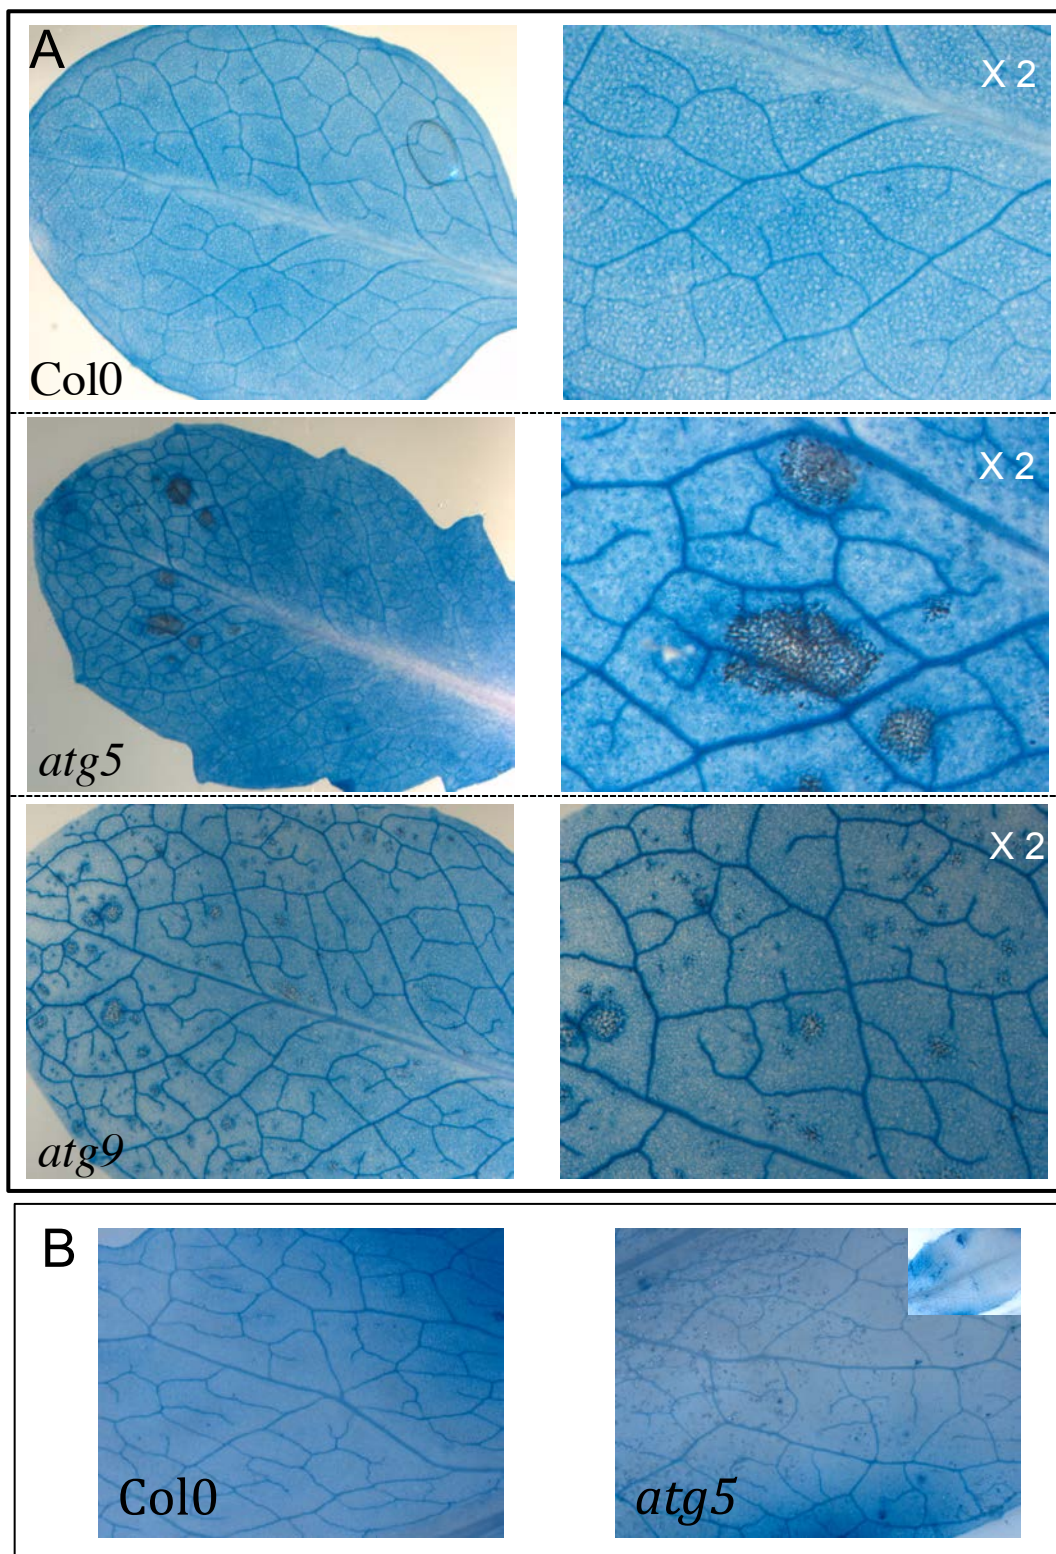

**Supplemental Figure 6: Cell death area on leaves of autophagy mutants.** Cell death regions were revealed after boiling leaves in trypan blue staining solution (glycerol 10 mL, lactic acid 10 mL, phenol 9.5 mL and trypan blue 10 mg) for 1 min and incubating at room temperature for 24 h afterward. Destaining was performed by transferring samples into chloral hydrate (1 g.mL<sup>-1</sup>). A: Col, *atg5*, *atg9* leaves of plants grown under low nitrate conditions for 60 days. B: Col and *atg5* leaves of plants grown under high nitrate conditions for 75 days. Dead cells appear as black clouds in leaf blades.

**Supplemental Table 1:** Flavonoid compounds identified and quantified using LC-MS.

| Compound name (other name)                                                                                                                    | Ion molecular mass (g.mol <sup>-1</sup> ) | fragment mass (g.mol <sup>-1</sup> )                                                                            | retention time (min)    |
|-----------------------------------------------------------------------------------------------------------------------------------------------|-------------------------------------------|-----------------------------------------------------------------------------------------------------------------|-------------------------|
| Cyanidin 3-O-[2''-O-(xylosyl)-6''-O-(p-coumaroyl) glucoside] 5-O-malonylglucoside ( <b>A974</b> )                                             | 975                                       | 535.2 [Cy + Glc + Mal]+<br>727.2 [Cy + Glc + Xyl + Cou]+<br>975.2 [Cy + 2Glc + Xyl + Cou + Mal]+                | 20                      |
| Cyanidin 3-O-[2''-O-(xylosyl) 6''-O-(p-O-(glucosyl) p-coumaroyl) glucoside] 5-O-[6'''-O-(malonyl) glucoside] ( <b>A1136</b> )                 | 1137                                      | 535.2 [Cy + Glc + Mal]+<br>889.2 [Cy + 2Glc + Xyl + Cou]+<br>1137.2 [Cy + 3Glc + Xyl + Cou + Mal]+              | 16                      |
| Cyanidin 3-O-[2''-O-(2'''-O-(sinapoyl) xylosyl) 6''-O-(p-O-coumaroyl) glucoside] 5-O-[6'''-O-(malonyl) glucoside] ( <b>A1182</b> )            | 1183                                      | 535.2 [Cy + Glc + Mal]+<br>933.2 [Cy + Glc + Xyl + Sin + Cou]+<br>1183.2 [Cy + 2Glc + Xyl + Sin + Cou + Mal]+   | 23                      |
| Cyanidin 3-O-[2''-O-(2'''-O-(synapoyl) xylosyl) 6''-O-(p-O-(glucosyl) p-coumaroyl) glucoside] 5-O-glucoside ( <b>A1256</b> )                  | 1257                                      | 1095.2 [Cy + 2Glc + Xyl + Cou + Sin]+<br>1257.2 [Cy + 3Glc + Xyl + Cou + Sin]+                                  | 17                      |
| Cyanidin 3-O-[2''-O-(6'''-O-(sinapoyl) xylosyl) 6''-O-(p-O-(glucosyl)-p-coumaroyl) glucoside] 5-O-(6'''-O-malonyl) glucoside ( <b>A1342</b> ) | 1343                                      | 535.2 [Cy + Glc + Mal]+<br>1095.2 [Cy + 2Glc + Xyl + Cou + Sin]+<br>1343.2 [Cy + 3Glc + Xyl + Cou + Sin + Mal]+ | 17 and<br>20 for isomer |
| Km-3,7-di-O-Rha                                                                                                                               | 579                                       | 287.2 [Km + H]+<br>433.2 [Km + Rha + H]+<br>579.2 [Km + 2Rha + H]+                                              | 21                      |
| Km-3-O-Glc-7-O-Rha                                                                                                                            | 595                                       | 287.2 [Km + H]+<br>433.2 [Km + Rha + H]+<br>595.2 [Km + Rha + Glc + H]+                                         | 19                      |
| Km-3-O-Rha(1-2)Glc-7-O-Rha                                                                                                                    | 741                                       | 287.2 [Km + H]+<br>433.2 [Km + Rha + H]+<br>741.2 [Km + 2Rha + Glc + H]+                                        | 15                      |
| Qr-3,7-di-Rha                                                                                                                                 | 303                                       |                                                                                                                 | 19                      |
| Qr-3-O-Glc-7-O-Rha                                                                                                                            | 611                                       | 303.2 [Qr + H]+<br>449.2 [Qr + Rha + H]+<br>611.2 [Qr + Rha + Glc + H]+                                         | 17                      |
| Qr-3-O-Rha(1-2)Glc-7-O-Rha                                                                                                                    | 757                                       | 303.2 [Qr + H]+<br>449.2 [Qr + Rha + H]+<br>757.2 [Qr + 2Rha + Glc + H]+                                        | 6                       |
| I-Glc-Rha                                                                                                                                     | 625                                       | 317.2 [I + H]+<br>463.2 [I + Rha + H]+<br>625.2 [I + Rha + Glc + H]+                                            | 19                      |
| Isomère Cyanidin 3-O-[2''-O-(6'''-O-(sinapoyl) xylosyl) 6''-O-(p-O-(glucosyl)-p-coumaroyl) glucoside] 5-O-(6'''-O-malonyl) glucoside          | <b>A1342 2</b>                            |                                                                                                                 |                         |

**Supplemental Table 2:** Metabolites significantly more or less concentrated in *atg5*, *atg5.sid2*, *atg5.NahG* compared to Col, *sid2*, or NahG controls are listed. Plants were grown under low or high nitrate conditions for 60 days after sowing. Significant differences were tested using T-tests (n=3) and probability is presented (*Pr*). Fold changes are also presented (FC). Yellow cells indicate increased concentrations in *atg5*. Blue cells indicate decreased concentrations in *atg5*. Black cells indicate non significant difference. Deep and light purple cells indicate metabolite on which differences that have been previously found between wild type and *atg5*, *atg9* and *RNAi18*. Deep purple indicates difference that are nitrate condition independent.

| Metabolites          | Low Nitrate (2 mM) |        |                         |        |                       |        | Metabolites         | High Nitrate (10 mM) |       |                         |       |                       |       |
|----------------------|--------------------|--------|-------------------------|--------|-----------------------|--------|---------------------|----------------------|-------|-------------------------|-------|-----------------------|-------|
|                      | <i>atg5/Col</i>    |        | <i>atg5-3.sid2/sid2</i> |        | <i>atg5.NahG/NahG</i> |        |                     | <i>atg5/Col</i>      |       | <i>atg5-3.sid2/sid2</i> |       | <i>atg5.NahG/NahG</i> |       |
|                      | <i>Pr</i>          | FC     | <i>Pr</i>               | FC     | <i>Pr</i>             | FC     |                     | <i>Pr</i>            | FC    | <i>Pr</i>               | FC    | <i>Pr</i>             | FC    |
| Glycosylsalicylate   | 0.000              | 15.587 | 0.006                   | 2.000  | -                     | -      | Melibiose           | 0.0086               | 0.277 | 0.009                   | 0.394 | 0.017                 | 0.374 |
| $\gamma$ -tocopherol | 0.000              | 4.230  | 0.018                   | 4.416  | -                     | -      | Galactosylglycerol  | 0.0064               | 0.671 | 0.031                   | 0.667 | 0.031                 | 0.622 |
| myo-Inositol         | 0.000              | 1.277  | 0.021                   | 1.158  | -                     | -      | Xylose              | 0.0230               | 0.777 | -                       | -     | 0.029                 | 0.743 |
| Campesterol          | 0.001              | 1.303  | 0.015                   | 1.191  | -                     | -      | Campesterol         | 0.0115               | 1.3   | 0.025                   | 1.2   | -                     | -     |
| Aspartate            | 0.000              | 2.189  | 0.046                   | 1.232  | 0.001                 | 1.859  | Monopalmitine       | 0.0231               | 1.4   | 0.014                   | 1.2   | -                     | -     |
| Rhamnose             | 0.001              | 1.918  | 0.004                   | 1.364  | 0.032                 | 1.443  | Glutamate           | 0.0107               | 1.4   | 0.026                   | 1.3   | -                     | -     |
| Glycerol-3-P         | 0.000              | 1.471  | 0.021                   | 1.364  | 0.002                 | 1.735  | $\beta$ -Sitosterol | 0.0005               | 1.4   | 0.004                   | 1.4   | -                     | -     |
| $\beta$ -Sitosterol  | 0.000              | 1.428  | 0.004                   | 1.365  | 0.003                 | 1.356  | Glycosylsalicylate  | 0.0158               | 2.3   | 0.022                   | 1.5   | -                     | -     |
| Ascorbate/Dehydro    | 0.002              | 1.507  | 0.005                   | 1.383  | 0.006                 | 1.672  | Homoserine          | 0.0011               | 1.5   | 0.043                   | 1.7   | -                     | -     |
| Tryptophan           | 0.002              | 1.656  | 0.034                   | 1.387  | 0.040                 | 1.258  | Raffinose           | 0.0434               | 1.9   | 0.001                   | 2.2   | -                     | -     |
| Fructose-6-P         | 0.003              | 1.632  | 0.026                   | 1.405  | 0.002                 | 1.837  | Shikimate           | 0.0002               | 1.5   | 0.001                   | 1.7   | 0.047                 | 1.3   |
| $\alpha$ -Tocopherol | 0.019              | 1.315  | 0.042                   | 1.427  | 0.002                 | 1.331  | Sinapinate-cis      | 0.0173               | 1.1   | -                       | -     | 0.047                 | 1.2   |
| Shikimate            | 0.000              | 2.247  | 0.003                   | 1.445  | 0.004                 | 1.929  | Threonine           | 0.0135               | 1.3   | -                       | -     | 0.022                 | 1.2   |
| Methionine           | 0.000              | 2.275  | 0.011                   | 1.459  | 0.003                 | 1.994  | Pipecolate          | 0.0005               | 6.9   | -                       | -     | 0.005                 | 2.3   |
| Linoleic acid        | 0.017              | 1.323  | 0.002                   | 1.514  | 0.001                 | 1.363  |                     |                      |       |                         |       |                       |       |
| Digalactosylglycerol | 0.001              | 1.781  | 0.002                   | 1.564  | 0.000                 | 1.893  |                     |                      |       |                         |       |                       |       |
| Ribonate             | 0.000              | 1.857  | 0.000                   | 1.637  | 0.002                 | 1.607  |                     |                      |       |                         |       |                       |       |
| Glutamate            | 0.000              | 1.623  | 0.000                   | 1.698  | 0.001                 | 1.716  |                     |                      |       |                         |       |                       |       |
| Sucrose              | 0.023              | 1.634  | 0.018                   | 2.490  | 0.019                 | 1.711  |                     |                      |       |                         |       |                       |       |
| Raffinose            | 0.000              | 2.805  | 0.000                   | 2.850  | 0.000                 | 3.398  |                     |                      |       |                         |       |                       |       |
| Pipecolate           | 0.000              | 49.057 | 0.001                   | 14.446 | 0.001                 | 41.247 |                     |                      |       |                         |       |                       |       |
| Fumarate             | 0.004              | 0.601  | -                       | -      | 0.024                 | 0.659  |                     |                      |       |                         |       |                       |       |
| Threonine            | 0.001              | 1.498  | -                       | -      | 0.041                 | 1.266  |                     |                      |       |                         |       |                       |       |
| Monopalmitine        | 0.004              | 1.252  | -                       | -      | 0.001                 | 1.414  |                     |                      |       |                         |       |                       |       |
| Salicylate           | 0.000              | 2.707  | -                       | -      | 0.009                 | 1.455  |                     |                      |       |                         |       |                       |       |
| Asparagine           | 0.001              | 1.864  | -                       | -      | 0.019                 | 1.483  |                     |                      |       |                         |       |                       |       |
| Ethanolamine         | 0.000              | 2.146  | -                       | -      | 0.007                 | 1.597  |                     |                      |       |                         |       |                       |       |
| Glucose-6-P          | 0.002              | 1.639  | -                       | -      | 0.003                 | 1.679  |                     |                      |       |                         |       |                       |       |
| Arginine             | 0.003              | 1.255  | -                       | -      | 0.018                 | 1.788  |                     |                      |       |                         |       |                       |       |
| Stigmasterol         | 0.000              | 4.777  | -                       | -      | 0.003                 | 1.909  |                     |                      |       |                         |       |                       |       |
| GABA                 | 0.021              | 1.709  | -                       | -      | 0.008                 | 1.912  |                     |                      |       |                         |       |                       |       |
| Galactonate          | 0.003              | 1.624  | -                       | -      | 0.000                 | 2.159  |                     |                      |       |                         |       |                       |       |
| Galactinol           | 0.000              | 1.944  | -                       | -      | 0.000                 | 2.253  |                     |                      |       |                         |       |                       |       |
| myo-Inositol-1-P     | 0.040              | 1.791  | -                       | -      | 0.002                 | 3.461  |                     |                      |       |                         |       |                       |       |



| AGI       | Annotation                                                 | has/involved in/located in                            | Function                                   | atg5 & atg9 30DAS | atg5 & atg9 60DAS | atg5 60DAS 10mM | References                             |
|-----------|------------------------------------------------------------|-------------------------------------------------------|--------------------------------------------|-------------------|-------------------|-----------------|----------------------------------------|
| At3g28580 | P-loop containing nucleoside triphosphate hydrolases       | ATPase activity                                       | hydrolase activity/ stress response        | 2.19              | 2.86              | 2.72            |                                        |
| At2g22470 | AGP2 arabinogalactan protein 2                             | anchored to membrane                                  | other membranes/cell wall                  | 3.48              | 3.05              | 1.49            |                                        |
| At1g35230 | AGP5, arabinogalactan protein 5                            | innate immune response                                | response to stress/ cell wall              | 3.06              | 4.88              | 2.99            |                                        |
| At1g33960 | AIG1 ATPase                                                | response to bacterium                                 | response to abiotic or biotic stimulus     | 4.00              | 5.75              | 1.88            |                                        |
| At1g79450 | ALISS, ALA-interacting subunit 5                           | amino acid transport                                  | transport                                  | 2.20              | 3.25              | 1.98            |                                        |
| At1g02220 | ANAC003                                                    | protein desumoylation                                 | other metabolic processes                  | 3.48              | 4.09              | 2.71            |                                        |
| At2g17040 | ANAC036                                                    | leaf morphogenesis                                    | developmental processes                    | 2.67              | 2.24              | 1.95            | Slocombe et al. 2009                   |
| At3g44350 | ANAC061                                                    | DNA binding                                           | DNA or RNA binding                         | 2.76              | 2.32              | 2.25            |                                        |
| At5g22380 | ANAC090                                                    | nucleus                                               | nucleus                                    | 3.06              | 1.69              | 1.51            |                                        |
| At5g20230 | ATBCB, SAG14, blue-copper-binding protein                  | response to fungus/ senescence                        | response to abiotic or biotic stimulus     | 2.42              | 3.65              | 2.99            |                                        |
| At1g01340 | ACBK1, CNGC10, cyclic nucleotide gated channel 10          | plasma membrane                                       | CA2+ and Mg2+ transport                    | 3.38              | 2.06              | 1.71            | Guo et al. 2010                        |
| At3g54420 | ATCHITIV, chitinase                                        | chitin binding                                        | other binding                              | 3.79              | 2.12              | 2.23            |                                        |
| At1g07000 | EXO70B2, exocyst subunit                                   | cell wall apposition                                  | respond to chitin and ER stress            | 2.72              | 1.64              | 1.39            | Pecenkova et al. 2011                  |
| At4g25110 | AtMC2, MC2, metacaspase 2                                  | cysteine-type endopeptidase activity                  | hydrolase activity                         | 3.36              | 3.93              | 2.53            |                                        |
| At3g13100 | ATMRP7, multidrug resistance-associated protein 7          | tonoplast/plasma membrane                             | ABC transporter/ cadmium                   | 3.42              | 3.52              | 2.13            | Wojas et al. 2009                      |
| At1g20350 | TIM17-1, translocase inner membrane subunit 17-1           | mitochondrial inner membrane presequence translocase  | stress response                            | 4.00              | 4.95              | 3.66            | Uggalla et al. 2009                    |
| At3g01290 | SPFH membrane-associated protein family                    | mitochondrion                                         | mitochondria                               | 2.68              | 3.18              | 2.57            |                                        |
| At1g11190 | BFN1, ENDO1, bifunctional nuclease 1                       | senescent leaf/ abscission zone                       | nuclease                                   | 2.13              | 3.52              | 4.14            | Farage-Barhom et al. 2008              |
| At5g56870 | BGAL4, beta-galactosidase 4                                | lactose catabolic process via UDP-galactose           | other metabolic processes                  | 2.84              | 3.71              | 4.45            |                                        |
| At3g22910 | ATPase E1-E2 type family protein                           | ATP biosynthetic process                              | other cellular processes                   | 2.85              | 2.70              | 2.29            |                                        |
| At3g01830 | Calcium-binding EF-hand family protein                     | salicylic acid mediated signaling pathway             | signal transduction                        | 6.30              | 4.58              | 3.43            |                                        |
| At5g47850 | CCR4, CRINKLY4 related 4                                   | protein phosphorylation                               | cell division/pericycle/lateral roots      | 2.82              | 4.00              | 3.45            | Smet et al. 2008                       |
| At2g43570 | CHI, chitinase, putative                                   | chitinase activity                                    | hydrolase activity                         | 2.39              | 5.00              | 2.82            |                                        |
| At1g09500 | NAD(P)-binding Rossmann-fold superfamily protein           | cellular metabolic process                            | other cellular processes                   | 3.22              | 4.27              | 5.73            |                                        |
| At5g42380 | CML37, CML39, calmodulin like 37                           | endoplasmic reticulum unfolded protein response       | signal transduction                        | 6.69              | 3.48              | 2.72            |                                        |
| At5g50260 | CEP1 KDEL-tailed cysteine endopeptidase                    | endoderm lateral roots                                | endopeptidase/ PCD/cell wall               | 2.32              | 2.49              | 2.19            | Helm et al. 2008                       |
| At3g49620 | DIN11, 2-oxoglutarate (2OG) and Fe(II)-dependent oxygenase | cellular response to starvation                       | dark induced                               | 2.68              | 3.44              | 1.63            |                                        |
| At3g60140 | BGLU30, DIN2, SRG2, Glycosyl hydrolase                     | response to sucrose stimulus                          | dark induced                               | 2.91              | 7.35              | 6.64            |                                        |
| At1g57630 | Toll-Interleukin-Resistance (TIR) domain family protein    | response to molecule of bacterial origin              | response to abiotic or biotic stimulus     | 5.35              | 4.34              | 2.46            |                                        |
| At2g18660 | PNP-A, plant natriuretic peptide A                         | response to endoplasmic reticulum stress              | regulator leaf dark respiration            | 3.82              | 5.24              | 2.90            | Ruzvidzo et al. 2011, Wang et al. 2011 |
| At1g26420 | FAD-binding Berberine family protein                       | UDP-N-acetylmuramate dehydrogenase activity           | other enzyme activity                      | 3.07              | 6.32              | 2.69            |                                        |
| At1g30700 | FAD-binding Berberine family protein                       | toxin catabolic process                               | other cellular processes                   | 2.92              | 6.22              | 9.18            |                                        |
| At1g02400 | ATGA2OX6, gibberellin 2-oxidase 6                          | GA inactivation/ oxidoreductase activity              | induced by low temperature and ABA         | 1.69              | 1.46              | 1.05            | Kendall et al. 2011                    |
| At4g14630 | GLP9, germin-like protein 9                                | response to salt stress                               | response to stress                         | 2.28              | 4.63              | 6.63            |                                        |
| At3g62950 | Thioredoxin superfamily protein                            | cytoplasm                                             | other cytoplasmic components               | 5.18              | 2.31              | 2.82            |                                        |
| At4g37900 | Protein of unknown function                                | biological_process                                    | response to salt stress                    | 3.21              | 2.74              | 4.74            |                                        |
| At2g35710 | Nucleotide-diphospho-sugar transferases                    | biosynthetic process                                  | other metabolic processes                  | 2.87              | 3.74              | 2.32            |                                        |
| At4g39670 | Glycolipid transfer protein (GLTP) family protein          | cytoplasm                                             | acyl lipid metabolism                      | 3.36              | 4.80              | 3.18            |                                        |
| At5g64790 | O-Glycosyl hydrolases family 17 protein                    | anchored to membrane                                  | other membranes                            | 2.87              | 1.31              | 2.16            |                                        |
| At5g52760 | Copper transport protein family                            | regulation of hydrogen peroxide metabolic process     | MAPK                                       | 2.77              | 4.10              | 2.46            |                                        |
| At3g50480 | HR4, homolog of RPW8 4                                     | response to other organism                            | interaction with beneficial microbes       | 2.44              | 2.81              | 2.06            | Saenz-Mata et al. 2012                 |
| At1g68620 | alpha/beta-Hydrolases superfamily protein                  | toxin catabolic process                               | other cellular processes                   | 4.24              | 3.89              | 4.52            |                                        |
| At2g34600 | JAZ7, jasmonate-zim-domain protein 7                       | jasmonic acid mediated signaling pathway              | cambium regulator                          | 2.80              | 2.53              | 2.07            | Sehr et al. 2010                       |
| At1g16420 | MCS8, metacaspase 8                                        | hydrogen peroxide-mediated programmed cell death      | response to UV                             | 3.38              | 2.90              | 1.79            | He et al. 2008                         |
| At1g62490 | mTERF                                                      | mTERF                                                 | unknown molecular functions                | 3.24              | 2.47              | 2.52            | Kleine 2012                            |
| At3g23250 | MYB15, myb domain protein 15                               | sequence-specific DNA binding transcription factor    | Cold stress                                | 4.37              | 4.33              | 2.66            | Chen et al. 2010                       |
| At2g47190 | MYB2, myb domain protein 2                                 | transcription factor                                  | Plant senescence/ Cytokinin/ IPT/ response | 2.23              | 2.16              | 2.65            | Guo and Gan, 2011                      |
| At3g26830 | CYP71B15, PAD3, Cytochrome P450                            | defense response to bacterium                         | camalexin production                       | 2.15              | 3.56              | 2.09            | Beets et al. 2012                      |
| At3g52430 | ATPAD4, PAD4, alpha/beta-Hydrolases                        | detection of external stimulus                        | lipase/ SA signalling                      | 2.51              | 2.80              | 2.27            | Jirage et al. 1999                     |
| At5g13320 | PBS3                                                       | GH3 amino acid conjugase                              | SA metabolism                              | 3.76              | 4.06              | 2.90            | Okrent and Wildermuth, 2011            |
| At2g26560 | PLA2A, phospholipase A 2A                                  | response to ethylene stimulus                         | Phospholipase A/ water loss                | 3.54              | 1.65              | 2.15            | Yang et al. 2012                       |
| At2g14610 | PR1, pathogenesis-related gene 1                           | regulation of plant-type hypersensitive response      | other cellular processes                   | 2.42              | 5.02              | 2.17            | Glazebrook et al. 1996                 |
| At5g25440 | Protein kinase superfamily protein                         | regulation of plant-type hypersensitive response      | other cellular processes                   | 2.39              | 2.41              | 1.83            |                                        |
| At1g72540 | Protein kinase superfamily protein                         | plasma membrane                                       | plasma membrane                            | 1.78              | 5.36              | 1.11            |                                        |
| At3g48650 | pseudogene, At14a-related protein                          | #N/A                                                  | #N/A                                       | 3.45              | 2.69              | 3.32            |                                        |
| At4g02380 | SAG21, senescence-associated gene 21                       | cellular response to water deprivation                | response to abiotic or biotic stimulus     | 3.43              | 1.83              | 2.22            |                                        |
| At5g43580 | UPI Serine protease inhibitor                              | UPI Unusual serine protease inhibitor                 | response to necrotrophe/ induced by stress | 2.20              | 7.02              | 5.77            | Laluk and Mengiste 2011                |
| At1g48210 | Protein kinase                                             | protein kinase activity                               | kinase activity                            | 2.90              | 1.59              | 2.30            |                                        |
| At3g51680 | SDR2 NAD(P)-binding Rossmann-fold superfamily protein      | oxidoreductase activity                               | ABA                                        | 2.37              | 3.44              | 2.02            |                                        |
| At2g41100 | ATCAL4, TCH3, Calcium-binding EF hand family protein       | vacuolar membrane                                     | other membranes                            | 1.87              | 1.83              | 1.47            |                                        |
| At2g32140 | transmembrane receptors                                    | ethylene biosynthetic process                         | other cellular processes                   | 2.86              | 3.24              | 2.68            |                                        |
| At4g04300 | transposable element gene                                  | #N/A                                                  | #N/A                                       | 4.11              | 3.42              | 3.68            |                                        |
| At2g13310 | transposable element gene                                  | #N/A                                                  | #N/A                                       | 3.48              | 4.70              | 4.14            |                                        |
| At3g11340 | UGT76B1 UDP-Glycosyltransferase                            | transferase activity                                  | conjugates Isoleucic acid/ JA and SA re    | 2.81              | 5.85              | 5.38            | von Saint Paul et al. 2011             |
| At3g53150 | UGT73D1, UDP-glucosyl transferase                          | metabolic process                                     | other metabolic processes                  | 2.38              | 4.52              | 1.89            |                                        |
| At2g43820 | UGT74F2, UDP-glucosyltransferase 74F2                      | benzoate metabolic process                            | coronatine signalling                      | 2.83              | 2.65              | 2.24            | Uppalapati et al. 2010                 |
| At1g20180 | unknown protein                                            | molecular_function                                    | unknown molecular functions                | 3.27              | 4.24              | 3.89            |                                        |
| At3g13950 | unknown protein                                            | defense response to fungus                            | response to abiotic or biotic stimulus     | 2.99              | 4.46              | 3.46            |                                        |
| At3g48640 | unknown protein                                            | defense response to fungus                            | response to abiotic or biotic stimulus     | 3.41              | 6.31              | 2.58            |                                        |
| At4g28460 | unknown protein                                            | extracellular region                                  | extracellular                              | 2.15              | 3.86              | 2.05            |                                        |
| At1g13340 | unknown protein                                            | cytoplasm                                             | other cytoplasmic components               | 3.39              | 3.26              | 2.85            |                                        |
| At1g76230 | unknown protein                                            | biological_process                                    | unknown biological processes               | 1.88              | 4.14              | 4.91            |                                        |
| At3g12510 | unknown protein                                            | molecular_function                                    | unknown molecular functions                | 3.81              | 2.78              | 2.58            |                                        |
| At2g04025 | unknown protein                                            | growth factor activity                                | receptor binding or activity               | 3.33              | 2.46              | 3.50            |                                        |
| At4g32870 | unknown protein                                            | molecular_function                                    | unknown molecular functions                | 2.69              | 3.09              | 2.95            |                                        |
| At2g22880 | VQ motif-containing protein                                | response to UV-B                                      | response to abiotic or biotic stimulus     | 4.35              | 2.99              | 3.76            |                                        |
| At1g78410 | VQ motif-containing protein                                | response to chitin                                    | other biological processes                 | 4.22              | 1.75              | 1.76            |                                        |
| At1g21240 | WAK3 (wall associated kinase 3)                            | protein phosphorylation                               | wall associated kinase                     | 4.25              | 3.55              | 2.60            | He et al. 1999                         |
| At4g31800 | WRKY18; transcription factor                               | transcription factor                                  | bacterial volatile response                | 2.30              | 2.56              | 1.87            | Wenkeet al. 2012                       |
| At5g22570 | WRKY38; transcription factor                               | defense response to bacterium                         | response to abiotic or biotic stimulus     | 4.40              | 5.58              | 2.22            | Kim et al. 2008                        |
| At1g04600 | MYA2 XIA (MYOSIN XI A); motor/ protein binding             | myosin complex                                        | transport peroxisomes, mitochondria,       | 4.29              | 2.02              | 1.46            | Walter and Holweg, 2008                |
| At5g57550 | XTR3 (XYLOGLUCAN ENDOTRANSGLYCOSYLASE 3)                   | xyloglucan:xyloglucosyl transferase activity          | transferase activity                       | 2.04              | 3.38              | 3.42            |                                        |
| At1g59590 | ZCF37                                                      | mitochondrion                                         | mitochondria                               | 3.64              | 2.41              | 2.16            |                                        |
| At5g04390 | zinc finger (C2H2 type)                                    | zinc ion binding                                      | other binding                              | 2.56              | 2.18              | 2.29            |                                        |
| At1g08050 | zinc finger (C3HC4-type RING finger)                       | systemic acquired resistance, salicylic acid mediated | other cellular processes                   | 1.58              | 2.53              | 2.78            |                                        |
| At4g14365 | zinc finger (C3HC4-type RING finger)                       | jasmonic acid mediated signaling pathway              | signal transduction                        | 2.29              | 2.95              | 1.97            |                                        |

## REFERENCES

- Beets, C.A., Huang, J.-C., Madala, N.E., and Dubery, I.** (2012). Activation of camalexin biosynthesis in *Arabidopsis thaliana* in response to perception of bacterial lipopolysaccharides: a gene-to-metabolite study. *Planta* **236**, 261-272.
- Chen, C.-C., Liang, C.-S., Kao, A.-L., and Yang, C.-C.** (2010). HHP1, a novel signalling component in the cross-talk between the cold and osmotic signalling pathways in *Arabidopsis*. *Journal of Experimental Botany* **61**, 3305-3320.
- De Smet, I., Vassileva, V., De Rybel, B., Levesque, M.P., Grunewald, W., Van Damme, D., Van Noorden, G., Naudts, M., Van Isterdael, G., De Clercq, R., Wang, J.Y., Meuli, N., Vanneste, S., Friml, J., Hilson, P., Juergens, G., Ingram, G.C., Inze, D., Benfey, P.N., and Beeckman, T.** (2008). Receptor-like kinase ACR4 restricts formative cell divisions in the *Arabidopsis* root. *Science* **322**, 594-597.
- Farage-Barhom, S., Burd, S., Sonogo, L., Mett, A., Belausov, E., Gidoni, D., and Lers, A.** (2011). Localization of the *Arabidopsis* Senescence- and Cell Death-Associated BFN1 Nuclease: From the ER to Fragmented Nuclei. *Molecular Plant* **4**, 1062-1073.
- Glazebrook, J., Rogers, E.E., and Ausubel, F.M.** (1996). Isolation of *Arabidopsis* mutants with enhanced disease susceptibility by direct screening. *Genetics* **143**, 973-982.
- Guo, K.M., Babourina, O., Christopher, D.A., Borsic, T., and Rengel, Z.** (2010). The cyclic nucleotide-gated channel AtCNGC10 transports Ca<sup>2+</sup> and Mg<sup>2+</sup> in *Arabidopsis*. *Physiologia Plantarum* **139**, 303-312.
- Guo, Y., and Gan, S.** (2011). AtMYB2 Regulates Whole Plant Senescence by Inhibiting Cytokinin-Mediated Branching at Late Stages of Development in *Arabidopsis*. *Plant Physiology* **156**, 1612-1619.
- He, R., Drury, G.E., Rotari, V.I., Gordon, A., Willer, M., Farzaneh, T., Woltering, E.J., and Gallois, P.** (2008). Metacaspase-8 modulates programmed cell death induced by ultraviolet light and H<sub>2</sub>O<sub>2</sub> in *Arabidopsis*. *Journal of Biological Chemistry* **283**, 774-783.
- Helm, M., Schmid, M., Hierl, G., Terneus, K., Tan, L., Lottspeich, F., Kieliszewski, M.J., and Gietl, C.** (2008). KDEL-tailed cysteine endopeptidases involved in programmed cell death, intercalation of new cells, and dismantling of extensin scaffolds. *American Journal of Botany* **95**, 1049-1062.
- Jirage, D., Tootle, T.L., Reuber, T.L., Frost, L.N., Feys, B.J., Parker, J.E., Ausubel, F.M., and Glazebrook, J.** (1999). *Arabidopsis thaliana* PAD4 encodes a lipase-like gene that is important for salicylic acid signaling. *Proceedings of the National Academy of Sciences of the United States of America* **96**, 13583-13588.
- Kato, H., Motomura, T., Komeda, Y., Saito, T., and Kato, A.** (2010). Overexpression of the NAC transcription factor family gene ANAC036 results in a dwarf phenotype in *Arabidopsis thaliana*. *Journal of Plant Physiology* **167**, 571-577.
- Kendall, S.L., Hellwege, A., Marriot, P., Whalley, C., Graham, I.A., and Penfield, S.** (2011). Induction of Dormancy in *Arabidopsis* Summer Annuals Requires Parallel Regulation of DOG1 and Hormone Metabolism by Low Temperature and CBF Transcription Factors. *Plant Cell* **23**, 2568-2580.
- Kim, K.-C., Lai, Z., Fan, B., and Chen, Z.** (2008). *Arabidopsis* WRKY38 and WRKY62 Transcription Factors Interact with Histone Deacetylase 19 in Basal Defense. *Plant Cell* **20**, 2357-2371.
- Laluk, K., and Mengiste, T.** (2011). The *Arabidopsis* extracellular UNUSUAL SERINE PROTEASE INHIBITOR functions in resistance to necrotrophic fungi and insect herbivory. *Plant Journal* **8**, 480-494.
- Okręent, R.A., and Wildermuth, M.C.** (2011). Evolutionary history of the GH3 family of acyl adenylases in rosids. *Plant Molecular Biology* **76**, 489-505.
- Pecenková, T., Hala, M., Kulich, I., Kocourková, D., Drdova, E., Fendrych, M., Toupalova, H., and Zarsky, V.** (2011). The role for the exocyst complex subunits Exo70B2 and Exo70H1 in the plant-pathogen interaction. *Journal of Experimental Botany* **62**, 2107-2116.
- Ruzvidzo, O., Donaldson, L., Valentine, A., and Gehring, C.** (2011). The *Arabidopsis thaliana* natriuretic peptide AtPNP-A is a systemic regulator of leaf dark respiration and signals via the phloem. *Journal of Plant Physiology* **168**, 1710-1714.
- Saenz-Mata, J., and Francisco Jimenez-Bremont, J.** (2012). HR4 Gene Is Induced in the *Arabidopsis*-*Trichoderma atroviride* Beneficial Interaction. *International Journal of Molecular Sciences* **13**, 9110-9128.
- Sehr, E.M., Agusti, J., Lehner, R., Farmer, E.E., Schwarz, M., and Greb, T.** (2010). Analysis of secondary growth in the *Arabidopsis* shoot reveals a positive role of jasmonate signalling in cambium formation. *Plant Journal* **63**, 811-822.
- Uppalapati, S.R., Ishiga, Y., Ryu, C.-M., Ishiga, T., Wang, K., Noel, L.D., Parker, J.E., and Mysore, K.S.** (2011). SGT1 contributes to coronatine signaling and *Pseudomonas syringae* pv. tomato disease symptom development in tomato and *Arabidopsis*. *New Phytologist* **189**, 83-93.
- von Saint Paul, V., Zhang, W., Kanawati, B., Geist, B., Faus-Kessler, T., Schmitt-Kopplin, P., and Schaeffner, A.R.** (2011). The *Arabidopsis* Glucosyltransferase UGT76B1 Conjugates Isoleucic Acid and Modulates Plant Defense and Senescence. *Plant Cell* **23**, 4124-4145.
- Walter, N., and Holweg, C.L.** (2008). Head-neck domain of *Arabidopsis* myosin XI, MYA2, fused with GFP produces F-actin patterns that coincide with fast organelle streaming in different plant cells. *Bmc Plant Biology* **8**.
- Wang, Y.H., Gehring, C., and Irving, H.R.** (2011). Plant Natriuretic Peptides are Apoplastic and Paracrine Stress Response Molecules. *Plant and Cell Physiology* **52**, 837-850.
- Wenke, K., Wanke, D., Kilian, J., Berendzen, K., Harter, K., and Piechulla, B.** (2012). Volatiles of two growth-inhibiting rhizobacteria commonly engage AtWRKY18 function. *Plant Journal* **70**, 445-459.
- Wojas, S., Hennig, J., Plaza, S., Geisler, M., Siemianowski, O., Sklodowska, A., Ruszczynska, A., Bulska, E., and Antosiewicz, D.M.** (2009). Ectopic expression of *Arabidopsis* ABC transporter MRP7 modifies cadmium root-to-shoot transport and accumulation. *Environmental Pollution* **157**, 2781-2789.
- Yang, W.-Y., Zheng, Y., Bahn, S.C., Pan, X.-Q., Li, M.-Y., Vu, H.S., Roth, M.R., Scheu, B., Welti, R., Hong, Y.-Y., and Wang, X.-M.** (2012). The Patatin-Containing Phospholipase A pPLAII alpha Modulates Oxylipin Formation and Water Loss in *Arabidopsis thaliana*. *Molecular Plant* **5**, 452-460.

Supplemental Table 4: Frequency of Gene Ontology terms (GO) represented in the 86 genes (see Table 4) up regulated in both atg5 and atg9 independently of nitrate conditions or plant age. Below is AGRIGO representation of the GO terms.

| Term       | Observed Frequency                                                   | Expected Frequency             | p-value  |
|------------|----------------------------------------------------------------------|--------------------------------|----------|
| GO:0050896 | response to stimulus<br>30 out of 81 genes, 37%                      | 3498 out of 27870 genes, 12.6% | 9.77E-06 |
| GO:0006950 | response to stress<br>20 out of 81 genes, 24.7%                      | 2058 out of 27870 genes, 7.4%  | 0.000235 |
| GO:0042221 | response to chemical stimulus<br>19 out of 81 genes, 23.5%           | 1824 out of 27870 genes, 6.5%  | 0.000235 |
| GO:0051707 | response to other organism<br>10 out of 81 genes, 12.3%              | 551 out of 27870 genes, 2%     | 0.000652 |
| GO:0006952 | defense response<br>11 out of 81 genes, 13.6%                        | 734 out of 27870 genes, 2.6%   | 0.000722 |
| GO:0006955 | immune response<br>7 out of 81 genes, 8.6%                           | 260 out of 27870 genes, 0.9%   | 0.000722 |
| GO:0009607 | response to biotic stimulus<br>10 out of 81 genes, 12.3%             | 603 out of 27870 genes, 2.2%   | 0.000722 |
| GO:0045087 | innate immune response<br>7 out of 81 genes, 8.6%                    | 256 out of 27870 genes, 0.9%   | 0.000722 |
| GO:0051704 | multi-organism process<br>10 out of 81 genes, 12.3%                  | 581 out of 27870 genes, 2.1%   | 0.000722 |
| GO:0002376 | immune system process<br>7 out of 81 genes, 8.6%                     | 292 out of 27870 genes, 1%     | 0.00134  |
| GO:0010200 | response to chitin<br>5 out of 81 genes, 6.2%                        | 127 out of 27870 genes, 0.5%   | 0.00194  |
| GO:0009751 | response to salicylic acid stimulus<br>5 out of 81 genes, 6.2%       | 144 out of 27870 genes, 0.5%   | 0.00316  |
| GO:0009617 | response to bacterium<br>6 out of 81 genes, 7.4%                     | 251 out of 27870 genes, 0.9%   | 0.00371  |
| GO:0009863 | salicylic acid mediated signaling pathway<br>3 out of 81 genes, 3.7% | 29 out of 27870 genes, 0.1%    | 0.00371  |
| GO:0071446 | NA<br>3 out of 81 genes, 3.7%                                        | 29 out of 27870 genes, 0.1%    | 0.00371  |

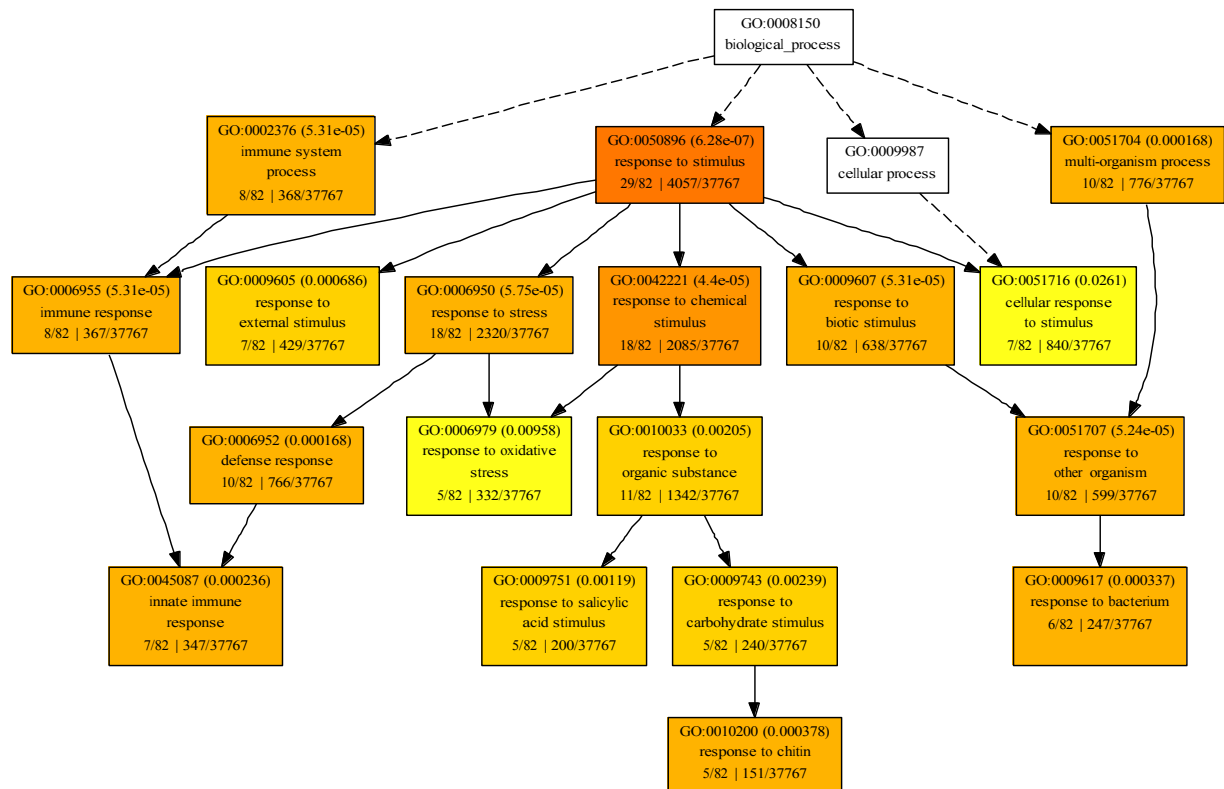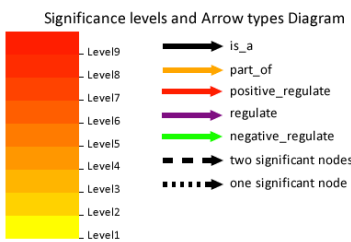

Supplemental Data. Masclaux-Daubresse et al. Plant Cell (2014) 10.1105/tpc.114.124677

Supplemental Table 5: Gene Ontology terms (GO) represented in the list of genes significantly up regulated in (i) *atg5* and *atg9* [*atg5&atg9*] grown under low nitrate conditions for 30 DAS, (ii) *atg5* and *atg9* [*atg5&atg9*] grown under low nitrate conditions for 60 DAS and (iii) *atg5* grown under high nitrate conditions for 60 DAS. Only GO terms with high significance (FDR<10-5) in at least one of the three gene lists are presented. Yellow to Orange colour intensities are relative to significance and inversely proportional to the FDR values.

| GO Information |                                                   | <i>atg5&amp;atg9</i> 30DAS lowN | <i>atg5&amp;atg9</i> 60DAS lowN | <i>atg5</i> 60DAS highN |
|----------------|---------------------------------------------------|---------------------------------|---------------------------------|-------------------------|
| GO Term        | Description                                       | FDR                             | FDR                             | FDR                     |
| GO:0006952     | defense response                                  | 1.10E-09                        | 3.10E-26                        | 1.80E-20                |
| GO:0009607     | response to biotic stimulus                       | 4.40E-07                        | 8.90E-18                        | 7.40E-15                |
| GO:0051707     | response to other organism                        | 9.30E-06                        | 3.20E-17                        | 1.00E-13                |
| GO:0050896     | response to stimulus                              | 1.70E-07                        | 1.70E-15                        | 3.50E-14                |
| GO:0006950     | response to stress                                | 3.10E-06                        | 5.10E-15                        | 2.90E-15                |
| GO:0006955     | immune response                                   | 6.80E-06                        | 5.10E-15                        | 5.30E-10                |
| GO:0002376     | immune system process                             | 7.10E-06                        | 5.10E-15                        | 5.40E-10                |
| GO:0045087     | innate immune response                            | 9.90E-06                        | 3.10E-14                        | 7.00E-09                |
| GO:0051704     | multi-organism process                            | 7.30E-06                        | 4.10E-14                        | 6.40E-13                |
| GO:0009617     | response to bacterium                             | 0.00086                         | 1.20E-13                        | 1.40E-11                |
| GO:0010200     | response to chitin                                | 3.30E-08                        | 2.20E-13                        | 1.50E-17                |
| GO:0031347     | regulation of defense response                    | 0.033                           | 7.50E-12                        | 0.0001                  |
| GO:0042221     | response to chemical stimulus                     | 3.20E-05                        | 2.70E-11                        | 2.40E-10                |
| GO:0042742     | defense response to bacterium                     | 0.0018                          | 5.40E-10                        | 5.10E-09                |
| GO:0080134     | regulation of response to stress                  | ---                             | 6.90E-10                        | 7.50E-05                |
| GO:0010033     | response to organic substance                     | 2.70E-07                        | 1.80E-09                        | 2.20E-08                |
| GO:0009620     | response to fungus                                | ---                             | 5.00E-09                        | 7.50E-05                |
| GO:0009743     | response to carbohydrate stimulus                 | 3.20E-05                        | 9.30E-09                        | 2.80E-13                |
| GO:0050832     | defense response to fungus                        | ---                             | 1.30E-08                        | 9.00E-06                |
| GO:0003824     | catalytic activity                                | 3.20E-06                        | 2.60E-07                        | 1.20E-06                |
| GO:0016798     | hydrolase activity, acting on glycosyl bonds      | ---                             | 1.70E-06                        | 0.00021                 |
| GO:0004553     | hydrolase activity, hydrolyzing O-glycosyl compo  | ---                             | 1.70E-06                        | 0.00055                 |
| GO:0009814     | defense response, incompatible interaction        | ---                             | 2.30E-06                        | 4.60E-06                |
| GO:0016787     | hydrolase activity                                | 0.022                           | 8.40E-06                        | 0.00055                 |
| GO:0016301     | kinase activity                                   | 5.80E-08                        | 1.60E-05                        | 1.20E-06                |
| GO:0016265     | death                                             | ---                             | 2.50E-05                        | 0.031                   |
| GO:0008219     | cell death                                        | ---                             | 2.50E-05                        | 0.031                   |
| GO:0009751     | response to salicylic acid stimulus               | ---                             | 4.30E-05                        | 4.50E-05                |
| GO:0019825     | oxygen binding                                    | ---                             | 4.70E-05                        | 0.0015                  |
| GO:0048583     | regulation of response to stimulus                | ---                             | 5.30E-05                        | ---                     |
| GO:0006979     | response to oxidative stress                      | ---                             | 0.00014                         | 2.30E-05                |
| GO:0009816     | defense response to bacterium, incompatible int   | ---                             | 0.00014                         | 2.40E-05                |
| GO:0016740     | transferase activity                              | 1.70E-06                        | 0.00028                         | 5.40E-06                |
| GO:0006468     | protein amino acid phosphorylation                | 1.70E-10                        | 0.00046                         | 8.40E-08                |
| GO:0009605     | response to external stimulus                     | ---                             | 0.00048                         | 5.70E-05                |
| GO:0016772     | transferase activity, transferring phosphorus-con | 7.90E-07                        | 0.001                           | 7.40E-05                |
| GO:0019748     | secondary metabolic process                       | ---                             | 0.0011                          | 6.60E-06                |
| GO:0006793     | phosphorus metabolic process                      | 5.10E-08                        | 0.002                           | 4.80E-06                |
| GO:0043687     | post-translational protein modification           | 1.50E-08                        | 0.0021                          | 9.00E-06                |
| GO:0009611     | response to wounding                              | ---                             | 0.0026                          | 1.10E-05                |
| GO:0006796     | phosphate metabolic process                       | 5.10E-08                        | 0.0029                          | 7.80E-06                |
| GO:0016310     | phosphorylation                                   | 3.50E-09                        | 0.0037                          | 4.40E-06                |
| GO:0010876     | lipid localization                                | 7.20E-14                        | 0.0047                          | 7.20E-14                |
| GO:0006464     | protein modification process                      | 7.30E-08                        | 0.021                           | 0.0015                  |
| GO:0001883     | purine nucleoside binding                         | 6.10E-09                        | ---                             | 0.0017                  |
| GO:0001882     | nucleoside binding                                | 6.10E-09                        | ---                             | 0.0017                  |
| GO:0030554     | adenyl nucleotide binding                         | 6.10E-09                        | ---                             | 0.0017                  |
| GO:0017076     | purine nucleotide binding                         | 1.20E-08                        | ---                             | 0.011                   |
| GO:0000166     | nucleotide binding                                | 1.70E-08                        | ---                             | ---                     |
| GO:0005524     | ATP binding                                       | 7.50E-08                        | ---                             | 0.012                   |
| GO:0032559     | adenyl ribonucleotide binding                     | 9.50E-08                        | ---                             | 0.013                   |
| GO:0032555     | purine ribonucleotide binding                     | 2.50E-07                        | ---                             | 0.046                   |
| GO:0032553     | ribonucleotide binding                            | 2.50E-07                        | ---                             | 0.046                   |
| GO:0009791     | post-embryonic development                        | 2.80E-07                        | ---                             | ---                     |
| GO:0043412     | macromolecule modification                        | 9.10E-07                        | ---                             | 0.027                   |
| GO:0003700     | transcription factor activity                     | 3.20E-06                        | ---                             | 0.033                   |
| GO:0003677     | DNA binding                                       | 6.90E-06                        | ---                             | ---                     |
| GO:0004674     | protein serine/threonine kinase activity          | 7.90E-05                        | ---                             | ---                     |
| GO:0004672     | protein kinase activity                           | 7.90E-05                        | ---                             | ---                     |
| GO:0030528     | transcription regulator activity                  | 7.90E-05                        | ---                             | ---                     |
| GO:0005488     | binding                                           | 9.10E-05                        | ---                             | ---                     |

**Supplemental Table 6:** Gene Ontology terms (GO) represented in the list of genes significantly down regulated in (i) *atg5* and *atg9* [*atg5&atg9*] grown under low nitrate conditions for 30 DAS, (ii) *atg5* and *atg9* [*atg5&atg9*] grown under low nitrate conditions for 60 DAS and (iii) *atg5* grown under high nitrate conditions for 60 DAS. Blue colour shows GO terms represented in at least two of these lists.

| GO Information |                                                                             | <i>atg5&amp;atg9</i> 30DAS lowN | <i>atg5&amp;atg9</i> 60DAS lowN | <i>atg5</i> 60DAS highN |
|----------------|-----------------------------------------------------------------------------|---------------------------------|---------------------------------|-------------------------|
| GO Term        | Description                                                                 | FDR                             | FDR                             | FDR                     |
| GO:0010876     | lipid localization                                                          |                                 | 0.00025 ---                     | 0.0055                  |
| GO:0005199     | structural constituent of cell wall                                         |                                 | 0.0038 ---                      | ---                     |
| GO:0003700     | transcription factor activity                                               |                                 | 0.016 ---                       | ---                     |
| GO:0004091     | carboxylesterase activity                                                   |                                 | 0.029 ---                       | ---                     |
| GO:0030528     | transcription regulator activity                                            |                                 | 0.035 ---                       | ---                     |
| GO:0012505     | endomembrane system                                                         |                                 | 0.0072 ---                      | 0.048                   |
| GO:0031225     | anchored to membrane                                                        |                                 | 0.023 ---                       | ---                     |
| GO:0042545     | cell wall modification                                                      | ---                             |                                 | 0.0097 ---              |
| GO:0042547     | cell wall modification during multidimensional cell growth                  | ---                             |                                 | 0.025 ---               |
| GO:0009831     | plant-type cell wall modification during multidimensional cell growth       | ---                             |                                 | 0.025 ---               |
| GO:0009631     | cold acclimation                                                            | ---                             |                                 | 0.025 ---               |
| GO:0009828     | plant-type cell wall loosening                                              | ---                             |                                 | 0.025 ---               |
| GO:0009827     | plant-type cell wall modification                                           | ---                             |                                 | 0.035 ---               |
| GO:0009698     | phenylpropanoid metabolic process                                           | ---                             | ---                             | 0.001                   |
| GO:0009699     | phenylpropanoid biosynthetic process                                        | ---                             | ---                             | 0.0034                  |
| GO:0010584     | pollen exine formation                                                      | ---                             | ---                             | 0.0093                  |
| GO:0019748     | secondary metabolic process                                                 | ---                             | ---                             | 0.01                    |
| GO:0008299     | isoprenoid biosynthetic process                                             | ---                             | ---                             | 0.015                   |
| GO:0010927     | cellular component assembly involved in morphogenesis                       | ---                             | ---                             | 0.02                    |
| GO:0042398     | cellular amino acid derivative biosynthetic process                         | ---                             | ---                             | 0.02                    |
| GO:0010208     | pollen wall assembly                                                        | ---                             | ---                             | 0.02                    |
| GO:0006575     | cellular amino acid derivative metabolic process                            | ---                             | ---                             | 0.02                    |
| GO:0009813     | flavonoid biosynthetic process                                              | ---                             | ---                             | 0.02                    |
| GO:0005982     | starch metabolic process                                                    | ---                             | ---                             | 0.033                   |
| GO:0019438     | aromatic compound biosynthetic process                                      | ---                             | ---                             | 0.04                    |
| GO:0009812     | flavonoid metabolic process                                                 | ---                             | ---                             | 0.04                    |
| GO:0006720     | isoprenoid metabolic process                                                | ---                             | ---                             | 0.046                   |
| GO:0016798     | hydrolase activity, acting on glycosyl bonds                                | ---                             | ---                             | 0.0054                  |
| GO:0016746     | transferase activity, transferring acyl groups                              | ---                             | ---                             | 0.017                   |
| GO:0016747     | transferase activity, transferring acyl groups other than amino-acyl groups | ---                             | ---                             | 0.017                   |
| GO:0004553     | hydrolase activity, hydrolyzing O-glycosyl compounds                        | ---                             | ---                             | 0.025                   |
| GO:0019825     | oxygen binding                                                              | ---                             | ---                             | 0.034                   |
| GO:0046527     | glucosyltransferase activity                                                | ---                             | ---                             | 0.034                   |

Supplemental Table 7: Differential expression in *atg5* and *atg9* relative to wild type of genes involved in the nitrogen assimilation pathway and in aspartate and glutamate metabolism. The Log<sub>2</sub>(fold change) values of the significantly differentially expressed genes are presented (FDR%<10<sup>-5</sup>). Comparisons are in *atg5* and *atg9* relative to wild type under Low nitrate (LowN) conditions, 30 and 60 days after sowing (DAS) and under High nitrate (HighN) conditions 60 days after sowing. ns is non significant.

|                                                           | <i>atg5</i> & <i>atg9</i> |              | <i>atg5</i> |
|-----------------------------------------------------------|---------------------------|--------------|-------------|
|                                                           | LowN 30DAS                | LowN 60DAS   | HighN 60DAS |
| AT1G77760 <i>NIA1</i> (NITRATE REDUCTASE 1)               | ns                        | <b>1.19</b>  | ns          |
| AT1G37130 <i>NIA2</i> (NITRATE REDUCTASE 2)               | ns                        | ns           | ns          |
| AT2G15620 <i>NIR1</i> (NITRITE REDUCTASE 1)               | ns                        | ns           | ns          |
| AT5G04140 <i>GLU1</i> (Fd-GLUTAMATE SYNTHASE)             | ns                        | ns           | ns          |
| AT2G41220 <i>GLU2</i> (Fd-GLUTAMATE SYNTHASE)             | <b>2.30</b>               | ns           | ns          |
| AT5G53460 <i>GLT1</i> (NADH-GLUTAMATE SYNTHASE)           | ns                        | ns           | ns          |
| AT5G35630 <i>GS2</i> (chloroplast GLUTAMINE SYNTHETASE 2) | ns                        | ns           | ns          |
| AT5G37600 <i>GLN1;1</i> (cytosol GLUTAMINE SYNTHETASE)    | ns                        | ns           | <b>1.34</b> |
| AT1G66200 <i>GLN1;2</i> (cytosol GLUTAMINE SYNTHETASE)    | ns                        | ns           | ns          |
| AT3G17820 <i>GLN1;3</i> (cytosol GLUTAMINE SYNTHETASE)    | ns                        | ns           | ns          |
| AT5G16570 <i>GLN1;4</i> (cytosol GLUTAMINE SYNTHETASE)    | ns                        | ns           | <b>1.71</b> |
| AT1G48470 <i>GLN1;5</i> (cytosol GLUTAMINE SYNTHETASE)    | ns                        | ns           | ns          |
| AT5G18170 <i>GDH1</i> (GLUTAMATE DEHYDROGENASE 1)         | ns                        | ns           | ns          |
| AT5G07440 <i>GDH2</i> (GLUTAMATE DEHYDROGENASE 2)         | ns                        | <b>2.12</b>  | ns          |
| AT3G03910 <i>GDH3</i> (GLUTAMATE DEHYDROGENASE 3)         | ns                        | 0.98         | ns          |
| AT1G51720 glutamate dehydrogenase, putative               | ns                        | 0.27         | ns          |
| AT3G47340 <i>ASN1</i> (ASPARAGINE SYNTHASE 1)             | ns                        | <b>2.73</b>  | ns          |
| AT5G65010 <i>ASN2</i> (ASPARAGINE SYNTHETASE 2)           | ns                        | ns           | ns          |
| AT5G10240 <i>ASN3</i> (ASPARAGINE SYNTHETASE 3)           | ns                        | ns           | ns          |
| AT2G30970 <i>ASP1</i> (ASPARTATE AMINOTRANSFERASE 1)      | ns                        | ns           | ns          |
| AT5G19550 <i>ASP2</i> (ASPARTATE AMINOTRANSFERASE 2)      | ns                        | ns           | ns          |
| AT5G11520 <i>ASP3</i> (ASPARTATE AMINOTRANSFERASE 3)      | ns                        | <b>1.33</b>  | <b>1.25</b> |
| AT1G62800 <i>ASP4</i> (ASPARTATE AMINOTRANSFERASE 4)      | ns                        | <b>-1.13</b> | ns          |
| AT4G31990 <i>ASP5</i> (ASPARTATE AMINOTRANSFERASE 5)      | ns                        | ns           | ns          |



**Supplemental Table 8:** Differential expression in *atg5* relative to wild type of genes involved in the shikimate and flavonoid pathways and reported by Lillo et al. (2008). The Log<sub>2</sub>(fold change) values of the differentially expressed genes are presented (FDR%<10-5). Yellow and blue colours indicate significant up and down regulations, respectively.

| Shikimate pathway    |                                                                                          | <i>atg5</i> lowN 30DAS | <i>atg5</i> lowN 60DAS | <i>atg5</i> highN 60DAS |
|----------------------|------------------------------------------------------------------------------------------|------------------------|------------------------|-------------------------|
| AT4G39980            | DHS1                                                                                     | -0.020                 | -0.532                 | -0.417                  |
| AT4G33510            | DHS2                                                                                     | 0.516                  | 0.236                  | -0.218                  |
| AT1G22410            | DHS3                                                                                     | 0.166                  | 1.132                  | 0.382                   |
| AT5G66120            | 3-dehydroquinate synthase                                                                | 0.114                  | -0.060                 | -0.222                  |
| AT3G06350            | MEE32 3-dehydroquinate dehydratase                                                       | 0.260                  | -0.012                 | -0.099                  |
| AT2G35500            | shikimate kinase-related                                                                 | 0.454                  | -0.541                 | -0.597                  |
| AT2G21940            | shikimate kinase, putative                                                               | 1.970                  | -0.520                 | -0.328                  |
| AT4G39540            | shikimate kinase family protein                                                          | 0.119                  | -0.433                 | -0.374                  |
| AT2G16790            | shikimate kinase family protein                                                          | 0.166                  | 1.169                  | 0.465                   |
| AT3G26900            | shikimate kinase family protein                                                          | 0.186                  | 0.303                  | 0.044                   |
| AT5G47050            | protein binding / zinc ion binding                                                       | 0.098                  | -0.387                 | 0.045                   |
| AT1G06890            | transporter-related                                                                      | 0.413                  | -0.656                 | -0.258                  |
| AT2G45300;A          | 3-phosphoshikimate 1-carboxyvinyltransferase / 5-enolpyruvylshikimate-3-phc              | -0.219                 | -0.232                 | -0.061                  |
| AT1G48850            | EMB1144 chorismate synthase                                                              | 0.083                  | -0.172                 | -0.292                  |
| AT3G29200            | CM1 (CHORISMATE MUTASE 1)                                                                | -0.373                 | 0.197                  | 0.227                   |
| AT5G10870            | ATCM2 (chorismate mutase 2)                                                              | -0.103                 | -0.304                 | -0.090                  |
| AT2G20610            | SUR1 S-alkylthiohydroximate lyase/ carbon-sulfur lyase/ transaminase                     | -0.359                 | -0.359                 | -0.157                  |
| AT2G38400            | AGT3 (ALANINE:GLYOXYLATE AMINOTRANSFERASE 3)                                             | 0.549                  | 2.727                  | 2.103                   |
| AT5G22630            | ADT5 (arogenate dehydratase 5)                                                           | 0.201                  | 0.407                  | 0.328                   |
| AT1G11790            | ADT1 (arogenate dehydratase 1)                                                           | -0.029                 | -0.066                 | -0.172                  |
| AT3G07630            | ADT2 (arogenate dehydratase 2)                                                           | 1.328                  | 0.296                  | -0.083                  |
| AT3G44720            | ADT4 (arogenate dehydratase 4)                                                           | 0.430                  | 1.298                  | 1.172                   |
| AT1G08250            | ADT6 (arogenate dehydratase 6)                                                           | 0.615                  | 0.020                  | -0.159                  |
| AT2G27820            | PD1 (PREPHENATE DEHYDRATASE 1)                                                           | -0.415                 | -0.441                 | -0.571                  |
| Flavonoid pathway    |                                                                                          | <i>atg5</i> lowN 30DAS | <i>atg5</i> lowN 60DAS | <i>atg5</i> highN 60DAS |
| AT3G10340            | PAL4 (Phenylalanine ammonia-lyase 4)                                                     | -0.122                 | 0.574                  | 0.762                   |
| AT5G04230            | PAL3 (PHENYL ALANINE AMMONIA-LYASE 3); phenylalanine ammonia-lyase                       | -0.796                 | -0.900                 | -0.116                  |
| AT3G53260            | PAL2; phenylalanine ammonia-lyase                                                        | -0.104                 | -0.270                 | -1.053                  |
| AT2G37040            | pal1 (Phe ammonia lyase 1)                                                               | 0.664                  | 0.397                  | -1.021                  |
| AT2G30490            | C4H (CINNAMATE 4-HYDROXYLASE)                                                            | 0.133                  | -0.003                 | -0.254                  |
| AT1G51680            | 4CL1 (4-COUMARATE:COA LIGASE 1)                                                          | 0.017                  | -0.040                 | -0.051                  |
| AT1G65060            | 4CL3; 4-coumarate-CoA ligase                                                             | 0.361                  | -0.541                 | -1.475                  |
| AT3G21230            | 4CL4 4CL5 (4-coumarate:CoA ligase 5)                                                     | -0.145                 | -0.191                 | -0.137                  |
| AT3G21240            | 4CL2 (4-COUMARATE:COA LIGASE 2)                                                          | -0.818                 | -0.333                 | -0.074                  |
| AT1G20490            | 4CL AMP-dependent synthetase and ligase family protein                                   | -0.336                 | -1.412                 | -1.554                  |
| AT5G13930            | TT4 (TRANSPARENT TESTA 4)                                                                | 0.101                  | -1.103                 | -1.012                  |
| AT3G55120            | TT5 (TRANSPARENT TESTA 5)                                                                | -0.056                 | -1.060                 | -1.836                  |
| AT3G51240            | TT6 F3H (FLAVANONE 3-HYDROXYLASE)                                                        | 0.370                  | -0.479                 | -1.509                  |
| AT5G07990            | TT7 (TRANSPARENT TESTA 7)                                                                | -0.278                 | -1.982                 | -3.424                  |
| AT5G08640            | FLS (FLAVONOL SYNTHASE)                                                                  | 0.205                  | -0.468                 | -0.983                  |
| AT3G50210            | FLS 2-oxoacid-dependent oxidase, putative                                                | -0.290                 | -0.304                 | -0.173                  |
| AT5G63580            | FLS2 (FLAVONOL SYNTHASE 2)                                                               | -0.466                 | -0.778                 | -0.462                  |
| AT5G63590            | FLS3 (FLAVONOL SYNTHASE 3)                                                               | 0.778                  | 1.384                  | 0.922                   |
| AT5G63600            | FLS5 (FLAVONOL SYNTHASE 5)                                                               | 1.929                  | 0.988                  | 2.287                   |
| AT1G06000            | FGT UDP-glucuronosyl/UDP-glucosyl transferase family protein                             | 0.411                  | 0.111                  | -0.179                  |
| AT1G30530            | FGT UGT78D1 (UDP-GLUCOSYL TRANSFERASE 78D1)                                              | -0.058                 | -0.827                 | -0.369                  |
| at2g22590            | FGT transferase, transferring glycosyl groups                                            | -0.698                 | 0.262                  | 0.124                   |
| at4g15480            | FGT UGT84A1; UDP-glycosyltransferase                                                     | 2.536                  | 2.142                  | 0.406                   |
| at5g17030            | FGT UGT78D3 (UDP-GLUCOSYL TRANSFERASE 78D3)                                              | -0.897                 | -0.850                 | -0.239                  |
| at5g17050            | FGT UGT78D2 (UDP-GLUCOSYL TRANSFERASE 78D2)                                              | -0.295                 | -0.301                 | -1.580                  |
| at5g42800            | DFR (TT3, DIHYDROFLAVONOL 4-REDUCTASE)                                                   | -0.157                 | -1.598                 | -2.842                  |
| AT4G22870;A          | LDOX, ANS [AT4G22870, leucoanthocyanidin dioxygenase, putative / anthocyanidin synthase] | -0.331                 | -1.331                 | -2.684                  |
| at5g17050            | AGT UGT78D2 (UDP-GLUCOSYL TRANSFERASE 78D2)                                              | -0.295                 | -0.301                 | -1.580                  |
| at4g14090            | AGT UDP-glucuronosyl/UDP-glucosyl transferase family protein                             | 0.130                  | -1.699                 | -2.729                  |
| at5g40600            | AGT UF3GT (udp-glucose:flavonoid 3-O-glucosyltransferase)                                | -0.440                 | -2.162                 | -2.874                  |
| at3g21560            | AGT UGT84A2; UDP-glycosyltransferase/ sinapate 1-glucosyltransferase                     | 0.170                  | -0.673                 | -0.888                  |
| at2g29750            | AGT UGT71C1 (UDP-GLUCOSYL TRANSFERASE 71C1); UDP-glycosyltransferase                     | 2.307                  | -0.525                 | 0.690                   |
| at4g01070            | AGT GT72B1; UDP-glycosyltransferase                                                      | -0.042                 | -0.288                 | -0.134                  |
| at1g22370            | AGT AUGC85A5 (UDP-glucosyl transferase 85A5)                                             | 0.668                  | -0.002                 | -0.431                  |
| at3g29590            | AAT AT5MAT; O-malonyltransferase/ transferase                                            | 0.002                  | -1.457                 | -2.547                  |
| AT1G03940;A          | transferase/ transferase, transferring acyl groups other than amino-acyl group:          | -0.195                 | -1.137                 | -2.740                  |
| at5g17220            | GST ATGSTF12 (ARABIDOPSIS THALIANA GLUTATHIONE S-TRANSFERASE 12)                         | -0.086                 | -2.032                 | -2.997                  |
| at1g02940            | GSTF5 (GLUTATHIONE S-TRANSFERASE (CLASS PHI) 5)                                          | -1.204                 | -1.067                 | -0.893                  |
| AT5G61160            | AACT1 (anthocyanin 5-aromatic acyltransferase 1)                                         | -2.025                 | -4.154                 | 2.105                   |
| Flavonoid Regulation |                                                                                          | <i>atg5</i> lowN 30DAS | <i>atg5</i> lowN 60DAS | <i>atg5</i> highN 60DAS |
| AT1G12910            | ATAN11 (ANTHOCYANIN11)                                                                   | -0.311                 | 0.441                  | 0.074                   |
| AT1G56650            | PAP1 (PRODUCTION OF ANTHOCYANIN PIGMENT 1)                                               | -0.162                 | -1.559                 | -2.094                  |
| AT4G00730            | ANL2 (ANTHOCYANINLESS 2)                                                                 | 0.243                  | -0.805                 | -0.097                  |
| AT5G24520            | TTG1 (TRANSPARENT TESTA GLABRA 1)                                                        | -0.026                 | 0.251                  | 0.561                   |
| AT5G40330            | MYB23 (MYB DOMAIN PROTEIN 23)                                                            | 0.999                  | -0.402                 | -0.187                  |
| AT1G66370            | MYB113 (myb domain protein 113)                                                          | -0.120                 | -0.825                 | -0.358                  |
| AT1G66380            | MYB114 (myb domain protein 114)                                                          | 3.171                  | -1.216                 | -0.914                  |
| AT4G09820            | TT8 (TRANSPARENT TESTA 8)                                                                | 1.525                  | -2.672                 | -3.381                  |
| AT1G66390            | PAP2 MYB90 (MYB DOMAIN PROTEIN 90)                                                       | 3.377                  | -1.472                 | -1.309                  |
| AT1G63650            | EGL3 (ENHANCER OF GLABRA 3)                                                              | -0.467                 | -0.416                 | -1.153                  |
| AT3G27920            | GL1 ATMYB0 (MYB DOMAIN PROTEIN 0)                                                        | 0.260                  | -0.180                 | -3.016                  |
| AT5G14750            | WER ATMYB66 (MYB DOMAIN PROTEIN 66)                                                      | 0.769                  | -0.150                 | 1.734                   |
| AT1G61720            | BAN (BANYULS)                                                                            | -0.544                 | -0.411                 | -0.200                  |

**Supplemental Table 9:** Differential expression in *atg5* & *atg9* relative to wild type of senescence associated genes (SAG). The Log<sub>2</sub>(fold change) values of the differentially expressed genes are presented (FDR%<10<sup>-5</sup>). Yellow and blue colours indicate significant up and down regulations respectively. Yellow and blue colours indicate significant up and down regulations respectively.

|                                               | <i>atg5&amp;atg9</i> lowN 30DAS | <i>atg5&amp;atg9</i> lowN 60DAS | <i>atg5</i> highN 60DAS |
|-----------------------------------------------|---------------------------------|---------------------------------|-------------------------|
| AT4G35770 SEN1 (SENESCENCE 1)                 | 1.2109                          | 4.5786                          | 2.8685                  |
| AT2G29350 SAG13                               | 1.1511                          | 4.4036                          | 3.0423                  |
| AT3G02040 SRG3                                | 2.3063                          | 2.7765                          | 0.1033                  |
| AT1G19200 senescence-associated protein       | -0.2973                         | 2.8885                          | 2.1315                  |
| AT5G13170 SAG29                               | 2.9157                          | 2.0904                          | 1.1636                  |
| AT1G17020 SRG1 (SENESCENCE-RELATED GENE)      | 1.5573                          | 2.1439                          | 1.7822                  |
| AT5G45890 SAG12 (SENESCENCE-ASSOCIATED C      | 3.8548                          | 3.8737                          | 6.6250                  |
| AT4G02380 SAG21 (SENESCENCE-ASSOCIATED C      | 3.4321                          | 1.8345                          | 2.2178                  |
| AT3G10985 SAG20 (SENESCENCE ASSOCIATED C      | 1.8256                          | 0.7924                          | 0.6194                  |
| AT3G51250 senescence/dehydration-associated   | -0.0972                         | 0.4199                          | 0.2193                  |
| AT3G48140 senescence-associated protein       | 0.0231                          | 0.3727                          | 0.3074                  |
| AT1G66330 senescence-associated family        | -0.0382                         | 0.0985                          | -0.1359                 |
| AT5G14930 SAG101 (SENESCENCE-ASSOCIATED       | 0.4348                          | 0.7193                          | 0.6426                  |
| AT4G35985 senescence/dehydration-associated   | 0.9390                          | 0.3842                          | 0.1568                  |
| AT1G20780 SAUL1 (SENESCENCE-ASSOCIATED E      | 0.8330                          | 0.3910                          | 1.7061                  |
| AT1G71190 SAG18 (SENESCENCE ASSOCIATED C      | 0.0263                          | -0.2102                         | -0.0385                 |
| AT2G25690 senescence-associated protein-relat | -0.7395                         | -0.3859                         | -0.7205                 |
| AT5G49120 senescence-associated protein-relat | -0.0494                         | -0.6251                         | -0.2357                 |
| AT3G21600 senescence/dehydration-associated   | -0.7806                         | -0.7152                         | -0.2542                 |
| AT5G47060 senescence-associated protein-relat | 0.2747                          | -0.4382                         | -0.3322                 |
| AT2G44670 senescence-associated protein-relat | 0.2771                          | -0.3222                         | -0.0042                 |
| AT1G78020 senescence-associated protein-relat | -0.4244                         | -0.6136                         | -0.1015                 |
| AT1G74940 senescence-associated protein-relat | -0.0313                         | -0.3845                         | -0.2532                 |
| AT4G17670 senescence-associated protein-relat | -0.3637                         | 0.3240                          | 0.5174                  |
| AT5G11460 senescence-associated protein-relat | -0.4533                         | -0.7064                         | -0.5761                 |
| AT5G65040 senescence-associated protein-relat | -0.2106                         | -0.9072                         | -0.3758                 |
| AT3G22550 senescence-associated protein-relat | -0.3742                         | -1.1482                         | -0.6552                 |
| AT1G22160 senescence-associated protein-relat | 0.2276                          | -0.7947                         | -0.1513                 |
| AT5G20700 senescence-associated protein-relat | 0.5614                          | -0.9248                         | -0.3382                 |

Supplemental Table 10: Differential expression (in *atg5* and *atg9* relative to wild type) of genes responding to salicylic acid (SA), jasmonic acid (JA), pathogen/wounding/ethylen or involved in camalexin biosynthesis in rosettes grown under low (lowN) or high (highN) nitrate conditions for 30 (30DAS) or 60 (60DAS) days after sowing. The log<sub>2</sub>(fold change) values of the differentially expressed genes are presented, yellow and blue colours indicate significant up and down regulations, respectively (FDR%<10-5). Adapted from Leeuwen et al. 2007 Plant Cell

| Gene Name <sup>a</sup> | AGI code       | log <sub>2</sub> (FC)                  |                                        |                         |                           |
|------------------------|----------------|----------------------------------------|----------------------------------------|-------------------------|---------------------------|
|                        |                | <i>atg5</i> and <i>atg9</i> lowN 30DAS | <i>atg5</i> and <i>atg9</i> lowN 60DAS | <i>atg5</i> highN 60DAS |                           |
| EDS1                   | At3g48090      | 0.76                                   | 1.77                                   | 1.37                    | SA regulated              |
| PAD4                   | At3g52430      | 2.51                                   | 2.80                                   | 2.27                    | SA regulated              |
| AtWRKY18               | At4g31800      | 2.30                                   | 2.56                                   | 1.87                    | SA regulated              |
| EDS5 (SID1)            | At4g39030      | 0.30                                   | 1.98                                   | 1.33                    | SA regulated              |
| PR1                    | At2g14610      | 2.42                                   | 5.02                                   | 2.17                    | SA regulated              |
| PLDgamma1              | At4g11850      | 0.45                                   | 0.95                                   | 1.41                    | SA regulated              |
| WAK1                   | At1g21250      | 0.91                                   | 1.72                                   | 1.46                    | SA regulated              |
| AtERF1                 | At4g17500      | 1.65                                   | 2.00                                   | 2.56                    | SA regulated              |
| PR5                    | At1g75040      | 0.39                                   | 4.04                                   | 1.64                    | SA regulated              |
| PAD3                   | At3g26830      | 2.15                                   | 3.56                                   | 2.09                    | SA regulated              |
| RAR047                 | At2g03760      | 1.11                                   | 1.84                                   | 1.25                    | SA regulated              |
| ap4.3a                 | At2g32800      | 0.73                                   | 0.89                                   | 0.77                    | SA regulated              |
| PR2 (BGL2)             | At3g57260      | 2.55                                   | 3.35                                   | 1.76                    | SA regulated              |
| HEL (PR4)              | At3g04720      | 0.75                                   | 0.00                                   | 0.37                    | SA regulated              |
| NHL3                   | At5g06320      | 0.60                                   | 1.17                                   | 1.63                    | SA regulated              |
| PDF1.2                 | At5g44420      | 2.08                                   | -0.03                                  | 1.96                    | JA regulated              |
| AtERT13                | At2g44840      | 2.08                                   | 0.23                                   | 3.70                    | JA regulated              |
| LOX1                   | At1g55020      | -0.18                                  | 2.15                                   | 1.17                    | JA regulated              |
| THI2.1                 | At1g72260      | -0.95                                  | -1.00                                  | -1.18                   | JA regulated              |
| LOX2                   | At3g45140      | 0.49                                   | -0.34                                  | -0.53                   | JA regulated              |
| PLDbeta                | At2g42010      | 0.97                                   | -0.04                                  | 0.32                    | pathogen/wounding/ethylen |
| bg3                    | At3g57240      | 1.58                                   | 3.22                                   | 3.09                    | pathogen/wounding/ethylen |
| PR3 (CHIA4)            | At3g54420      | 3.79                                   | 2.12                                   | 2.23                    | pathogen/wounding/ethylen |
| PAL2                   | At3g53260      | -0.14                                  | -0.30                                  | -1.05                   | pathogen/wounding/ethylen |
| PAL1                   | At2g37040      | 0.57                                   | 0.22                                   | -1.02                   | pathogen/wounding/ethylen |
| ECS1 (CXc750)          | At1g31580      | 0.21                                   | 0.07                                   | 0.13                    | pathogen/wounding/ethylen |
| NPR1/NIM1              | At1g64280      | 0.04                                   | 1.14                                   | 0.99                    | pathogen/wounding/ethylen |
| 4CL                    | At1g51680      | -0.13                                  | -0.27                                  | -0.05                   | pathogen/wounding/ethylen |
| ELI3                   | At4g37980      | 0.12                                   | -0.65                                  | -0.32                   | pathogen/wounding/ethylen |
| ASA1                   | At5g05730      | 0.16                                   | 1.13                                   | 0.99                    | pathogen/wounding/ethylen |
| AtCMPG1                | At1g66160      | 2.04                                   | 1.78                                   | 1.17                    | pathogen/wounding/ethylen |
| PLDalpha1              | At3g15730      | -0.02                                  | -0.39                                  | -0.16                   | pathogen/wounding/ethylen |
| ap3.3a                 | At3g50360      | 0.52                                   | -0.61                                  | -0.33                   | pathogen/wounding/ethylen |
| DHS1                   | At4g39980      | -0.03                                  | -0.50                                  | -0.42                   | pathogen/wounding/ethylen |
| CYP79B2; electron car  | AT4G39950      | 0.00                                   | 1.99                                   | 1.97                    | camalexin biosynthesis    |
| CYP79B3; electron car  | AT2G22330      | 0.63                                   | -0.38                                  | -0.02                   | camalexin biosynthesis    |
| CYP71A16; electron c:  | AT5G42590      | -0.91                                  | -0.02                                  | 0.62                    | camalexin biosynthesis    |
| CYP71A13 (cytochrom    | AT2G30770      | 0.00                                   | 3.08                                   | 1.75                    | camalexin biosynthesis    |
| cytochrome P450        | AT4G13310;AT4G | 1.05                                   | 1.85                                   | 0.97                    | camalexin biosynthesis    |
| WRKY33; transcriptio   | AT2G38470      | 1.49                                   | 1.17                                   | 1.19                    | camalexin biosynthesis    |
| PAD3 (PHYTOALEXIN I    | AT3G26830      | 2.15                                   | 3.56                                   | 2.09                    | camalexin biosynthesis    |

Supplemental Table 11: Differential expression of WRKY genes in rosettes of *atg5* relative to wild type, grown under low (lowN) or high (highN) nitrate conditions for 30 (30DAS) or 60 (60DAS) days after sowing.The log<sub>2</sub>(fold change) values of the differentially expressed genes are presented, Yellow and blue colours indicate significant up and down regulations, respectively (FDR%<10<sup>-5</sup>). Breeze et al. 2011

| AGI       | name   | <i>atg5&amp;atg9</i> lowN 30DAS | <i>atg5&amp;atg9</i> lowN 60DAS | <i>atg5</i> highN 60DAS | senescence related* |
|-----------|--------|---------------------------------|---------------------------------|-------------------------|---------------------|
| AT5G22570 | WRKY38 | 4.40                            | 5.58                            | 2.22                    | no                  |
| AT5G13080 | WRKY75 | -0.24                           | 5.67                            | 4.74                    | yes                 |
| AT5G24110 | WRKY30 | 1.08                            | 5.21                            | 3.24                    | yes                 |
| AT1G18860 | WRKY61 | -0.06                           | 4.98                            | 2.90                    | yes                 |
| AT3G01080 | WRKY58 | 1.29                            | 3.34                            | 3.62                    | no                  |
| AT4G31800 | WRKY18 | 2.30                            | 2.56                            | 1.87                    | no                  |
| AT3G01970 | WRKY45 | 1.17                            | 2.31                            | 5.51                    | yes                 |
| AT2G46400 | WRKY46 | 1.34                            | 2.48                            | 1.90                    | no                  |
| AT2G40750 | WRKY54 | 1.78                            | 2.67                            | 1.46                    | no                  |
| AT3G56400 | WRKY70 | 1.13                            | 2.45                            | 1.36                    | no                  |
| AT2G40740 | WRKY55 | 0.21                            | 2.16                            | 1.97                    | yes                 |
| AT4G23810 | WRKY53 | 1.25                            | 2.06                            | 2.24                    | no                  |
| AT1G80840 | WRKY40 | 2.27                            | 1.87                            | 1.48                    | yes                 |
| AT5G15130 | WRKY72 | 1.44                            | 1.96                            | 1.20                    | yes                 |
| AT1G64000 | WRKY56 | -0.43                           | 2.20                            | -0.58                   | no                  |
| AT2G30250 | WRKY25 | 0.54                            | 1.86                            | 1.69                    | yes                 |
| AT2G23320 | WRKY15 | 0.38                            | 1.81                            | 1.72                    | yes                 |
| AT2G25000 | WRKY60 | -0.42                           | 1.27                            | 1.14                    | no                  |
| AT2G38470 | WRKY33 | 1.49                            | 1.17                            | 1.19                    | yes                 |
| AT1G62300 | WRKY6  | 1.28                            | 0.96                            | 1.37                    | yes                 |
| AT5G49520 | WRKY48 | 1.60                            | 0.87                            | 1.02                    | yes                 |
| AT1G55600 | WRKY10 | -1.07                           | 0.52                            | 1.28                    | no                  |
| AT1G69810 | WRKY36 | -1.70                           | 0.89                            | 2.05                    | yes                 |
| AT4G01720 | WRKY47 | 0.77                            | 1.05                            | 1.19                    | yes                 |
| AT4G04450 | WRKY42 | 0.56                            | 0.44                            | -0.41                   | no                  |
| AT5G46350 | WRKY8  | 0.20                            | 0.81                            | 0.14                    | no                  |
| AT2G24570 | WRKY17 | 1.23                            | 0.32                            | 1.13                    | no                  |
| AT4G18170 | WRKY28 | 1.22                            | 0.58                            | 1.75                    | yes                 |
| AT3G04670 | WRKY39 | -0.42                           | 0.46                            | 0.71                    | no                  |
| AT1G66550 | WRKY67 | 0.15                            | 0.18                            | -0.58                   | no                  |
| AT1G29860 | WRKY71 | -0.34                           | 0.25                            | 1.10                    | no                  |
| AT4G12020 | WRKY19 | 0.12                            | 0.14                            | 0.31                    | no                  |
| AT5G07100 | WRKY26 | 2.32                            | 0.33                            | 1.05                    | yes                 |
| AT1G13960 | WRKY4  | 0.45                            | -0.06                           | -0.02                   | yes                 |
| AT4G01250 | WRKY22 | 1.10                            | -0.03                           | 0.52                    | no                  |
| AT1G69310 | WRKY57 | 1.36                            | -0.06                           | 0.07                    | no                  |
| AT4G24240 | WRKY7  | -0.43                           | 0.11                            | -0.10                   | no                  |
| AT5G28650 | WRKY74 | -1.38                           | 0.38                            | 0.35                    | no                  |
| AT2G30590 | WRKY21 | -0.21                           | -0.15                           | -0.21                   | no                  |
| AT4G31550 | WRKY11 | 0.17                            | -0.16                           | 0.25                    | no                  |
| AT1G68150 | WRKY9  | 1.45                            | -0.88                           | 1.63                    | no                  |
| AT3G58710 | WRKY69 | -0.42                           | -0.22                           | -0.21                   | yes                 |
| AT1G29280 | WRKY65 | 0.81                            | -0.20                           | -0.35                   | yes                 |
| AT4G26640 | WRKY20 | -0.47                           | -0.47                           | 0.03                    | no                  |
| AT4G26440 | WRKY34 | -0.46                           | 0.62                            | -1.23                   | yes                 |
| AT4G22070 | WRKY31 | 0.42                            | -0.32                           | 0.54                    | no                  |
| AT4G39410 | WRKY13 | 0.24                            | -0.32                           | 0.74                    | no                  |
| AT4G30935 | WRKY32 | -0.37                           | -0.60                           | -0.46                   | no                  |
| AT1G80590 | WRKY66 | -1.15                           | -0.51                           | 0.02                    | no                  |
| AT2G03340 | WRKY3  | 0.24                            | -0.39                           | -0.24                   | yes                 |
| AT5G56270 | WRKY2  | -0.42                           | -0.47                           | -0.28                   | no                  |
| AT2G47260 | WRKY23 | 0.11                            | -0.45                           | -0.06                   | no                  |
| AT5G52830 | WRKY27 | 0.18                            | -0.67                           | 0.09                    | no                  |
| AT2G46130 | WRKY43 | -0.49                           | -0.88                           | -1.58                   | no                  |
| AT1G30650 | WRKY14 | -1.22                           | -0.78                           | 0.15                    | no                  |
| AT2G34830 | WRKY35 | -0.94                           | -1.75                           | 0.73                    | no                  |

\* according to Supplemental Dataset 1. Genes differentially expressed during senescence. Breeze et al.

(2011) PLANTCELL 10.1105/tpc.111.083345

Supplemental Table 12: Differential expression (in *atg5* & *atg9* relative to wild type) of NAC genes in rosettes grown under low (lowN) or high (highN) nitrate conditions for 30 (30DAS) or 60 (60DAS) days after sowing.The log<sub>2</sub>(fold change) values of the differentially expressed genes are presented, yellow and blue colours indicate significant up and down regulations, respectively (FDR%<10 Breeze et al. 2011<sup>3</sup>).

| AGI       | NAC gene name                 | <i>atg5</i> & <i>atg9</i> lowN 30DAS | <i>atg5</i> & <i>atg9</i> lowN 60DAS | <i>atg5</i> highN 60DAS | senescence related* |
|-----------|-------------------------------|--------------------------------------|--------------------------------------|-------------------------|---------------------|
| AT3G15500 | ANAC055 (ARABIDOPSIS NAC I    | -1.37                                | 4.79                                 | 4.35                    | yes                 |
| AT4G29230 | anac075 (Arabidopsis NAC dor  | 0.04                                 | 4.19                                 | 4.60                    | no                  |
| AT1G02220 | ANAC003 (Arabidopsis NAC dc   | 3.48                                 | 4.09                                 | 2.71                    | yes                 |
| AT2G17040 | anac036 (Arabidopsis NAC dor  | 2.67                                 | 2.24                                 | 1.95                    | no                  |
| AT1G52890 | ANAC019 (Arabidopsis NAC dc   | 0.34                                 | 2.29                                 | 2.29                    | yes                 |
| AT3G04060 | anac046 (Arabidopsis NAC dor  | 0.56                                 | 2.12                                 | 2.27                    | yes                 |
| AT3G61910 | ANAC066 (ARABIDOPSIS NAC I    | 0.93                                 | 2.04                                 | -0.63                   | no                  |
| AT3G44350 | anac061 (Arabidopsis NAC dor  | 2.76                                 | 2.32                                 | 2.25                    | no                  |
| AT5G14000 | anac084 (Arabidopsis NAC dor  | -0.61                                | 2.01                                 | 2.98                    | yes                 |
| AT5G18270 | ANAC087; transcription factor | 0.87                                 | 2.16                                 | 1.43                    | yes                 |
| AT5G39610 | ATNAC6 (ARABIDOPSIS NAC D     | 0.32                                 | 2.04                                 | 2.22                    | yes                 |
| AT3G04070 | anac047 (Arabidopsis NAC dor  | 0.74                                 | 2.07                                 | 1.66                    | yes                 |
| AT3G17730 | anac057 (Arabidopsis NAC dor  | 1.52                                 | 1.80                                 | 0.74                    | no                  |
| AT2G43000 | anac042 (Arabidopsis NAC dor  | -0.90                                | 1.60                                 | 1.51                    | yes                 |
| AT5G22380 | anac090 (Arabidopsis NAC dor  | 3.06                                 | 1.69                                 | 1.51                    | no                  |
| AT1G69490 | NAP (NAC-like, activated by A | 1.75                                 | 1.63                                 | 2.34                    | yes                 |
| AT1G34180 | anac016 (Arabidopsis NAC dor  | 0.02                                 | 1.38                                 | 1.56                    | yes                 |
| AT5G56620 | anac099 (Arabidopsis NAC dor  | 0.77                                 | 1.50                                 | -0.46                   | no                  |
| AT5G63790 | ANAC102 (ARABIDOPSIS NAC I    | 0.38                                 | 1.06                                 | 1.24                    | yes                 |
| AT3G29035 | ATNAC3 (ARABIDOPSIS NAC D     | 0.19                                 | 0.94                                 | 0.94                    | yes                 |
| AT5G62380 | ANAC101 (ARABIDOPSIS NAC-     | 0.69                                 | 0.80                                 | 1.22                    | no                  |
| AT4G17980 | anac071 (Arabidopsis NAC dor  | -1.52                                | 0.64                                 | 0.74                    | no                  |
| AT1G01010 | ANAC001 (Arabidopsis NAC dc   | 1.27                                 | 0.75                                 | 0.42                    | no                  |
| AT1G28470 | ANAC010 (ARABIDOPSIS NAC I    | -1.06                                | 0.64                                 | -0.16                   | no                  |
| AT1G32870 | ANAC13 (Arabidopsis thaliana  | 1.18                                 | 0.69                                 | 0.39                    | yes                 |
| AT5G64060 | anac103 (Arabidopsis NAC dor  | 0.12                                 | 0.93                                 | 1.02                    | yes                 |
| AT1G02250 | anac005 (Arabidopsis NAC dor  | -0.01                                | 0.60                                 | -0.73                   | yes                 |
| AT5G07680 | ANAC080 (ARABIDOPSIS NAC I    | 2.24                                 | 0.73                                 | 2.01                    | yes                 |
| AT3G10500 | anac053 (Arabidopsis NAC dor  | -0.10                                | 0.67                                 | 0.72                    | yes                 |
| AT5G61430 | ANAC100 (ARABIDOPSIS NAC I    | -0.22                                | 1.00                                 | 0.71                    | yes                 |
| AT5G09330 | anac082 (Arabidopsis NAC dor  | -0.25                                | 0.66                                 | 0.22                    | no                  |
| AT2G33480 | ANAC041 (Arabidopsis NAC dc   | 0.24                                 | 0.73                                 | 0.85                    | yes                 |
| AT1G77450 | anac032 (Arabidopsis NAC dor  | 0.28                                 | 0.49                                 | 0.52                    | yes                 |
| AT1G25580 | ANAC008 (Arabidopsis NAC dc   | 1.26                                 | 0.66                                 | 0.61                    | no                  |
| AT1G33280 | ANAC015 (Arabidopsis NAC dc   | -0.10                                | 0.78                                 | 1.25                    | no                  |
| AT1G56010 | NAC1; transcription factor    | 2.10                                 | 0.43                                 | 0.03                    | yes                 |
| AT5G41090 | anac095 (Arabidopsis NAC dor  | -0.99                                | 0.15                                 | 0.37                    | no                  |
| AT3G03200 | anac045 (Arabidopsis NAC dor  | -0.04                                | 0.49                                 | -1.59                   | no                  |
| AT5G04410 | NAC2; transcription factor    | -0.05                                | 0.30                                 | 0.18                    | yes                 |
| AT5G13180 | ANAC083 (ARABIDOPSIS NAC I    | -0.11                                | 0.52                                 | 0.61                    | yes                 |
| AT1G60280 | ANAC023 (Arabidopsis NAC dc   | -1.23                                | 0.40                                 | 0.15                    | no                  |
| AT1G60350 | anac024 (Arabidopsis NAC dor  | -0.81                                | 0.11                                 | 0.23                    | no                  |
| AT5G39820 | anac094 (Arabidopsis NAC dor  | 0.14                                 | 0.10                                 | 0.84                    | no                  |
| AT2G24430 | ANAC038 (ARABIDOPSIS NAC I    | -0.50                                | 0.10                                 | 0.82                    | no                  |
| AT3G49530 | anac062 (Arabidopsis NAC dor  | 0.61                                 | 0.16                                 | -0.18                   | yes                 |
| AT5G66300 | NAC105 (NAC DOMAIN CONT       | -0.58                                | -0.23                                | -0.66                   | no                  |
| AT4G10350 | ANAC070 (Arabidopsis NAC dc   | -0.64                                | -0.20                                | 0.25                    | yes                 |
| AT1G65910 | anac028 (Arabidopsis NAC dor  | 0.07                                 | -0.08                                | -0.12                   | no                  |
| AT4G28530 | anac074 (Arabidopsis NAC dor  | -0.21                                | -0.25                                | -0.11                   | yes                 |
| AT1G32770 | ANAC012 (ARABIDOPSIS NAC I    | -1.10                                | -0.35                                | 1.86                    | no                  |
| AT3G18400 | anac058 (Arabidopsis NAC dor  | 0.10                                 | -0.40                                | -0.43                   | no                  |
| AT1G34190 | anac017 (Arabidopsis NAC dor  | 0.36                                 | -0.05                                | 0.09                    | yes                 |
| AT5G17260 | anac086 (Arabidopsis NAC dor  | -0.26                                | -0.33                                | 1.86                    | no                  |
| AT5G04400 | anac077 (Arabidopsis NAC dor  | -0.72                                | -0.44                                | 0.25                    | yes                 |
| AT5G50820 | anac097 (Arabidopsis NAC dor  | 1.60                                 | -0.41                                | -0.18                   | no                  |
| AT5G22290 | anac089 (Arabidopsis NAC dor  | -0.31                                | -0.32                                | -0.12                   | yes                 |
| AT1G62700 | ANAC026; transcription factor | 0.43                                 | -0.53                                | 0.15                    | no                  |
| AT1G54330 | ANAC020 (Arabidopsis NAC dc   | 1.90                                 | -0.16                                | 1.53                    | no                  |
| AT4G36160 | ANAC076 (ARABIDOPSIS NAC I    | 0.33                                 | -0.28                                | -0.28                   | no                  |
| AT4G01550 | anac069 (Arabidopsis NAC dor  | 0.16                                 | -0.51                                | -0.51                   | no                  |
| AT2G02450 | ANAC035 (Arabidopsis NAC dc   | 0.84                                 | -0.42                                | 0.07                    | no                  |
| AT3G04420 | anac048 (Arabidopsis NAC dor  | 1.36                                 | -0.54                                | -0.99                   | yes                 |
| AT5G46590 | anac096 (Arabidopsis NAC dor  | -0.92                                | 0.02                                 | -0.44                   | no                  |
| AT1G12260 | ANAC007 (ARABIDOPSIS NAC I    | -1.27                                | -0.55                                | 2.71                    | no                  |
| AT3G15510 | ATNAC2 (ARABIDOPSIS NAC D     | 0.49                                 | -0.35                                | 0.12                    | yes                 |
| AT4G28500 | ANAC073 (ARABIDOPSIS NAC I    | 0.29                                 | -0.73                                | 0.04                    | no                  |
| AT1G61110 | anac025 (Arabidopsis NAC dor  | -0.11                                | -0.26                                | -0.13                   | no                  |

\* according to Supplemental Dataset 1. Genes differentially expressed during senescence. Breeze et al. (2011)

PLANTCELL 10.1105/tpc.111.083345
